# Supplementary material for: New isohemigossypol related conjugates and caffeoylated oleanane triterpenoids from Hibiscus syriacus roots with anti-senescence modulating activity
Source: Royal Society of Chemistry journal article supplement (doi:10.1039/d6ra01557c), 2026-04-23
Supplement: d6ra01557c1.pdf [file d6ra01557c1.pdf]

## Supporting Information

### **New isohemigossypol related conjugates and caffeoylated oleanane triterpenoids from Hibiscus syriacus roots with anti-senescence modulating activity**

Hyo-Moon Cho<sup>a,†</sup>, Minh-Thi-Tuyet Le<sup>a,†</sup>, Ji-Hye Shin<sup>a</sup>, Van-Hieu Mai<sup>a</sup>, Seri Choi<sup>a</sup>, Jin-Pyo An<sup>a</sup>,  
Yun-Sil Lee<sup>b,c</sup>, and Won-Keun Oh<sup>a,\*</sup>

<sup>a</sup>Research Institute of Pharmaceutical Sciences, College of Pharmacy, Seoul National University,  
Seoul 08826, Republic of Korea

<sup>b</sup>Graduate School of Pharmaceutical Sciences and College of Pharmacy, Ewha Womans  
University, Seoul 03760, Republic of Korea

<sup>c</sup>Innovative BioPharmChem Convergence Education and Research Program, Ewha Womans  
University, Seoul 03760, Republic of Korea

† These authors contributed equally to this work.

\*Corresponding author.

E-mail address: wkoh1@snu.ac.kr (W.K. Oh).

|                                                                                                                                                                                                                   |          |
|-------------------------------------------------------------------------------------------------------------------------------------------------------------------------------------------------------------------|----------|
| <b>1. Supplemental spectra of compounds 1-6 .....</b>                                                                                                                                                             | <b>5</b> |
| 1.1 Compound 1 .....                                                                                                                                                                                              | 5        |
| <b>Figure S1.</b> <sup>1</sup> H NMR spectrum of compound 1 (500 MHz, CDCl <sub>3</sub> ).....                                                                                                                    | 5        |
| <b>Figure S2.</b> <sup>13</sup> C NMR spectrum of compound 1 (125 MHz, CDCl <sub>3</sub> ).....                                                                                                                   | 5        |
| <b>Figure S3.</b> Edited HSQC NMR spectrum of compound 1 (500 MHz, CDCl <sub>3</sub> ).....                                                                                                                       | 6        |
| <b>Figure S4.</b> HMBC NMR spectrum of compound 1 (500 MHz, CDCl <sub>3</sub> ).....                                                                                                                              | 6        |
| <b>Figure S5.</b> <sup>1</sup> H- <sup>1</sup> H COSY NMR spectrum of compound 1 (500 MHz, CDCl <sub>3</sub> ).....                                                                                               | 7        |
| <b>Figure S6.</b> NOESY NMR spectrum of compound 1 (500 MHz, CDCl <sub>3</sub> ).....                                                                                                                             | 7        |
| <b>Figure S7.</b> The key NOESY correlations to determine the position of methyl groups and dioxane ring position (a), and the possible structures depending on the dioxane ring position (b) in compound 1. .... | 8        |
| <b>Figure S8.</b> HRESIMS spectrum of compound 1. ....                                                                                                                                                            | 9        |
| <b>Figure S9.</b> IR spectrum of compound 1.....                                                                                                                                                                  | 9        |
| 1.2 Compound 2 .....                                                                                                                                                                                              | 10       |
| <b>Figure S10.</b> <sup>1</sup> H NMR spectrum of compound 2 (500 MHz, CDCl <sub>3</sub> ) after impurity peak exclusion (processed data shown; raw FID data included).....                                       | 10       |
| <b>Figure S11.</b> <sup>13</sup> C NMR spectrum of compound 2 (125 MHz, CDCl <sub>3</sub> ).....                                                                                                                  | 10       |
| <b>Figure S12.</b> Edited HSQC NMR spectrum of compound 2 (500 MHz, CDCl <sub>3</sub> ).....                                                                                                                      | 11       |
| <b>Figure S13.</b> HMBC NMR spectrum of compound 2 (500 MHz, CDCl <sub>3</sub> ).....                                                                                                                             | 11       |
| <b>Figure S14.</b> <sup>1</sup> H- <sup>1</sup> H COSY NMR spectrum of compound 2 (500 MHz, CDCl <sub>3</sub> ).....                                                                                              | 12       |
| <b>Figure S15.</b> NOESY NMR spectrum of compound 2 (500 MHz, CDCl <sub>3</sub> ).....                                                                                                                            | 12       |
| <b>Figure S16.</b> The key NOESY correlations to determine the position of methyl groups and dioxane ring position in compound 2. ....                                                                            | 13       |
| <b>Figure S17.</b> HRESIMS spectrum of compound 2. ....                                                                                                                                                           | 13       |
| <b>Figure S18.</b> IR spectrum of compound 2.....                                                                                                                                                                 | 14       |
| 1.3 Compound 3 .....                                                                                                                                                                                              | 15       |
| <b>Figure S19.</b> <sup>1</sup> H NMR spectrum of compound 3 (600 MHz, CDCl <sub>3</sub> ) after impurity peak exclusion (processed data shown; raw FID data included).....                                       | 15       |
| <b>Figure S20.</b> <sup>13</sup> C NMR spectrum of compound 3 (150 MHz, CDCl <sub>3</sub> ).....                                                                                                                  | 15       |
| <b>Figure S21.</b> Edited HSQC NMR spectrum of compound 3 (600 MHz, CDCl <sub>3</sub> ).....                                                                                                                      | 16       |
| <b>Figure S22.</b> HMBC NMR spectrum of compound 3 (600 MHz, CDCl <sub>3</sub> ).....                                                                                                                             | 16       |
| <b>Figure S23.</b> <sup>1</sup> H- <sup>1</sup> H COSY NMR spectrum of compound 3 (600 MHz, CDCl <sub>3</sub> ).....                                                                                              | 17       |
| <b>Figure S24.</b> NOESY NMR spectrum of compound 3 (600 MHz, CDCl <sub>3</sub> ).....                                                                                                                            | 17       |
| <b>Figure S25.</b> The key NOESY correlations to determine the position of the methyl group and dioxane ring position (a), and the possible structures of 3 depending on the dioxane ring position (b). ....      | 18       |

|                                                                                                                                                                                                           |           |
|-----------------------------------------------------------------------------------------------------------------------------------------------------------------------------------------------------------|-----------|
| <b>Figure S26.</b> HRESIMS spectrum of compound <b>3</b> .                                                                                                                                                | 19        |
| <b>Figure S27.</b> IR spectrum of compound <b>3</b> .                                                                                                                                                     | 19        |
| 1.4 Compound <b>4</b>                                                                                                                                                                                     | 20        |
| <b>Figure S28.</b> <sup>1</sup> H NMR spectrum of compound <b>4</b> (600 MHz, CD <sub>3</sub> OD).                                                                                                        | 20        |
| <b>Figure S29.</b> <sup>13</sup> C NMR spectrum of compound <b>4</b> (150 MHz, CD <sub>3</sub> OD).                                                                                                       | 20        |
| <b>Figure S30.</b> Edited HSQC NMR spectrum of compound <b>4</b> (600 MHz, CD <sub>3</sub> OD).                                                                                                           | 21        |
| <b>Figure S31.</b> HMBC NMR spectrum of compound <b>4</b> (600 MHz, CD <sub>3</sub> OD).                                                                                                                  | 21        |
| <b>Figure S32.</b> <sup>1</sup> H- <sup>1</sup> H COSY NMR spectrum of compound <b>4</b> (600 MHz, CD <sub>3</sub> OD).                                                                                   | 22        |
| <b>Figure S33.</b> NOESY NMR spectrum of compound <b>4</b> (600 MHz, CD <sub>3</sub> OD).                                                                                                                 | 22        |
| <b>Figure S34.</b> HRESIMS spectrum of compound <b>4</b> .                                                                                                                                                | 23        |
| <b>Figure S35.</b> IR spectrum of compound <b>4</b> .                                                                                                                                                     | 23        |
| 1.5 Compound <b>5</b>                                                                                                                                                                                     | 24        |
| <b>Figure S36.</b> <sup>1</sup> H NMR spectrum of compound <b>5</b> (600 MHz, CD <sub>3</sub> OD).                                                                                                        | 24        |
| <b>Figure S37.</b> <sup>13</sup> C NMR spectrum of compound <b>5</b> (150 MHz, CD <sub>3</sub> OD) after impurity peak exclusion to improve signal clarity (processed data shown; raw FID data included). | 24        |
| <b>Figure S38.</b> Edited HSQC NMR spectrum of compound <b>5</b> (600 MHz, CD <sub>3</sub> OD).                                                                                                           | 25        |
| <b>Figure S39.</b> HMBC NMR spectrum of compound <b>5</b> (600 MHz, CD <sub>3</sub> OD).                                                                                                                  | 25        |
| <b>Figure S40.</b> <sup>1</sup> H- <sup>1</sup> H COSY NMR spectrum of compound <b>5</b> (600 MHz, CD <sub>3</sub> OD).                                                                                   | 26        |
| <b>Figure S41.</b> NOESY NMR spectrum of compound <b>5</b> (600 MHz, CD <sub>3</sub> OD).                                                                                                                 | 26        |
| <b>Figure S42.</b> HRESIMS spectrum of compound <b>5</b> .                                                                                                                                                | 27        |
| <b>Figure S43.</b> IR spectrum of compound <b>5</b> .                                                                                                                                                     | 27        |
| 1.6 Compound <b>6</b>                                                                                                                                                                                     | 28        |
| <b>Figure S44.</b> <sup>1</sup> H NMR spectrum of compound <b>6</b> (400 MHz, CD <sub>3</sub> OD).                                                                                                        | 28        |
| <b>Figure S45.</b> <sup>13</sup> C NMR spectrum of compound <b>6</b> (100 MHz, CD <sub>3</sub> OD).                                                                                                       | 28        |
| <b>Figure S46.</b> Edited HSQC NMR spectrum of compound <b>6</b> (400 MHz, CD <sub>3</sub> OD).                                                                                                           | 29        |
| <b>Figure S47.</b> HMBC NMR spectrum of compound <b>6</b> (400 MHz, CD <sub>3</sub> OD).                                                                                                                  | 29        |
| <b>Figure S48.</b> <sup>1</sup> H- <sup>1</sup> H COSY NMR spectrum of compound <b>6</b> (400 MHz, CD <sub>3</sub> OD).                                                                                   | 30        |
| <b>Figure S49.</b> NOESY NMR spectrum of compound <b>6</b> (400 MHz, CD <sub>3</sub> OD).                                                                                                                 | 30        |
| <b>Figure S50.</b> HRESIMS spectrum of compound <b>6</b> .                                                                                                                                                | 31        |
| <b>Figure S51.</b> IR spectrum of compound <b>6</b> .                                                                                                                                                     | 31        |
| <b>2. Supplemental ECD calculation</b>                                                                                                                                                                    | <b>32</b> |
| <b>Figure S52.</b> 3D structural models of the minimized main conformers for compound <b>1</b> .                                                                                                          | 32        |

|                                                                                                                                                                                                                              |           |
|------------------------------------------------------------------------------------------------------------------------------------------------------------------------------------------------------------------------------|-----------|
| <b>Figure S53.</b> 3D structural models of the minimized main conformers for compound <b>3</b> .....                                                                                                                         | 32        |
| <b>3. Supplemental biological data</b> .....                                                                                                                                                                                 | <b>33</b> |
| <b>Figure S54.</b> Effects of compounds isolated from <i>H. syriacus</i> on <i>p16<sup>INK4A</sup></i> promoter activity.....                                                                                                | 33        |
| <b>Figure S55.</b> Cell viability of bleomycin-induced IMR-90 fibroblast treated with compounds <b>9</b> and <b>10</b> .....                                                                                                 | 34        |
| <b>4. Supplemental tables</b> .....                                                                                                                                                                                          | <b>35</b> |
| <b>Table S1.</b> <sup>1</sup> H and <sup>13</sup> C NMR spectroscopic data for compounds <b>1–3</b> .....                                                                                                                    | 35        |
| <b>Table S2.</b> <sup>1</sup> H and <sup>13</sup> C NMR spectroscopic data for compounds <b>4–6</b> .....                                                                                                                    | 36        |
| <b>Table S3.</b> Calculated total energies, relative free energies ( $\Delta G$ ), relative population (%) and theoretical (DFT B3LYP/6-31G) averaged rotary strength values for the major compound <b>1</b> conformers..... | 37        |
| <b>Table S4.</b> Calculated total energies, relative free energies ( $\Delta G$ ), relative population (%) and theoretical (DFT B3LYP/6-31G) averaged rotary strength values for the major compound <b>3</b> conformers..... | 37        |
| <b>Table S5.</b> Optimized coordinates of the conformers of compound <b>1</b> .....                                                                                                                                          | 38        |
| <b>Table S6.</b> Optimized coordinates of the conformers of compound <b>3</b> .....                                                                                                                                          | 40        |

# 1. Supplemental spectra of compounds 1–6

## 1.1 Compound 1

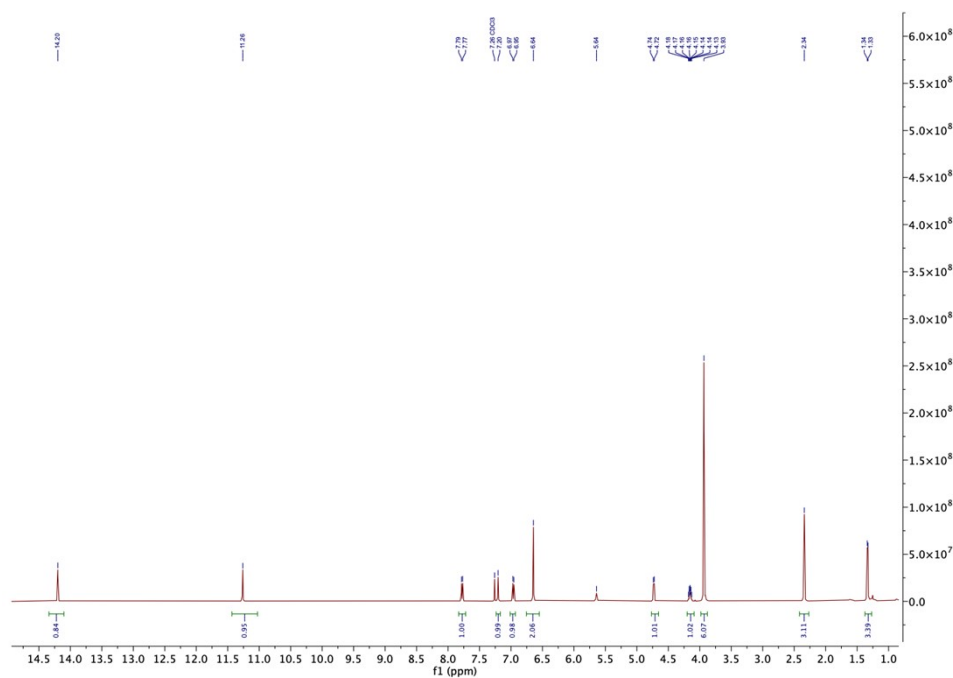

Figure S1. <sup>1</sup>H NMR spectrum of compound 1 (500 MHz, CDCl<sub>3</sub>).

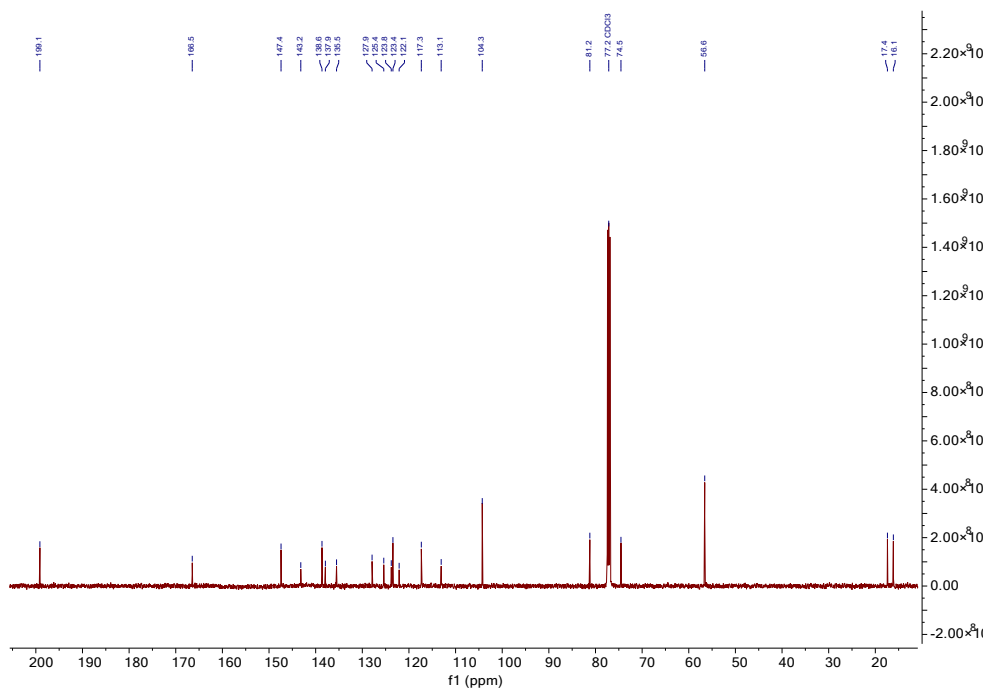

Figure S2. <sup>13</sup>C NMR spectrum of compound 1 (125 MHz, CDCl<sub>3</sub>).

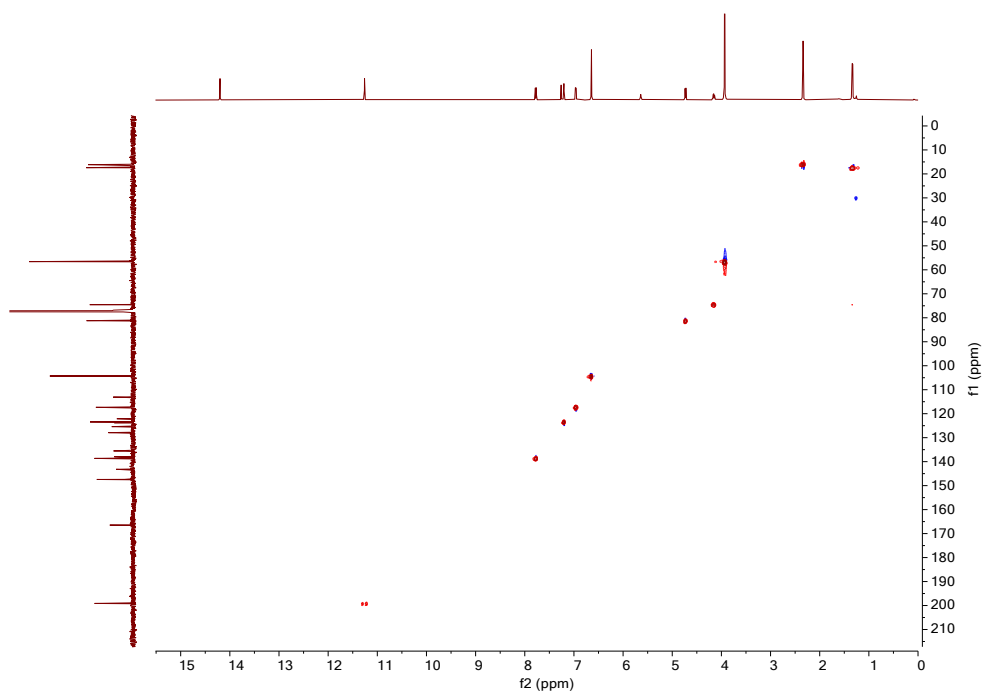

**Figure S3.** Edited HSQC NMR spectrum of compound **1** (500 MHz,  $\text{CDCl}_3$ ).

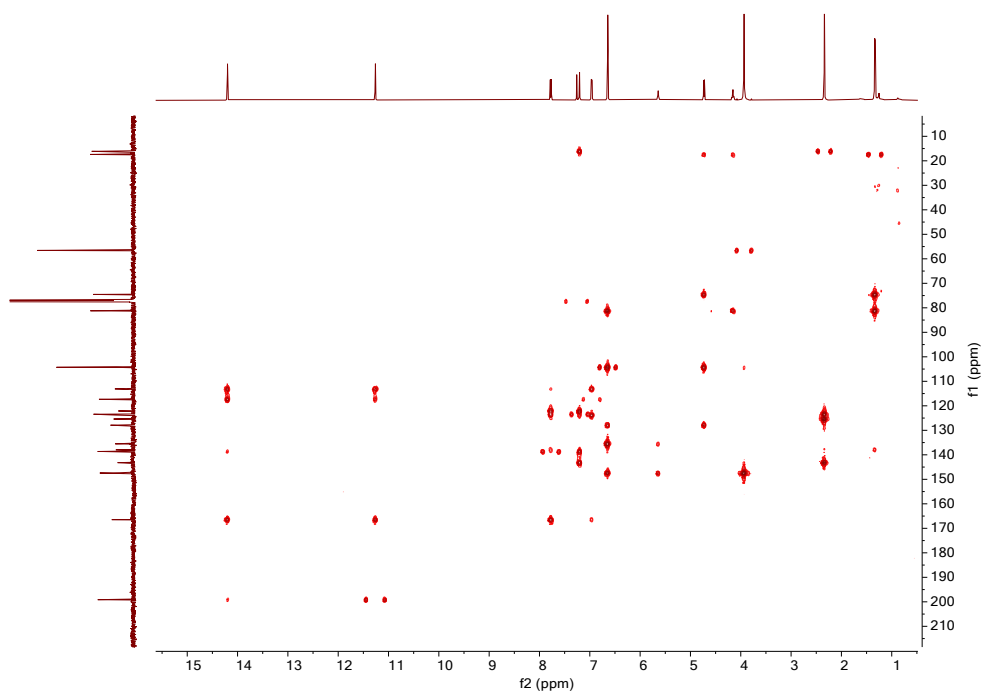

**Figure S4.** HMBC NMR spectrum of compound **1** (500 MHz,  $\text{CDCl}_3$ ).

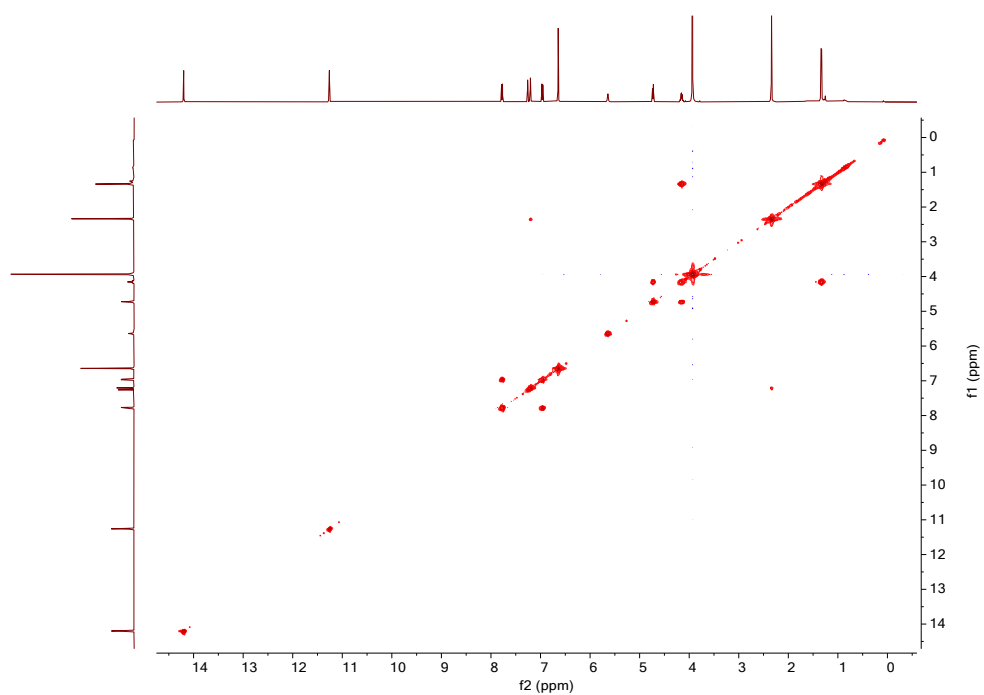

**Figure S5.** <sup>1</sup>H-<sup>1</sup>H COSY NMR spectrum of compound **1** (500 MHz, CDCl<sub>3</sub>).

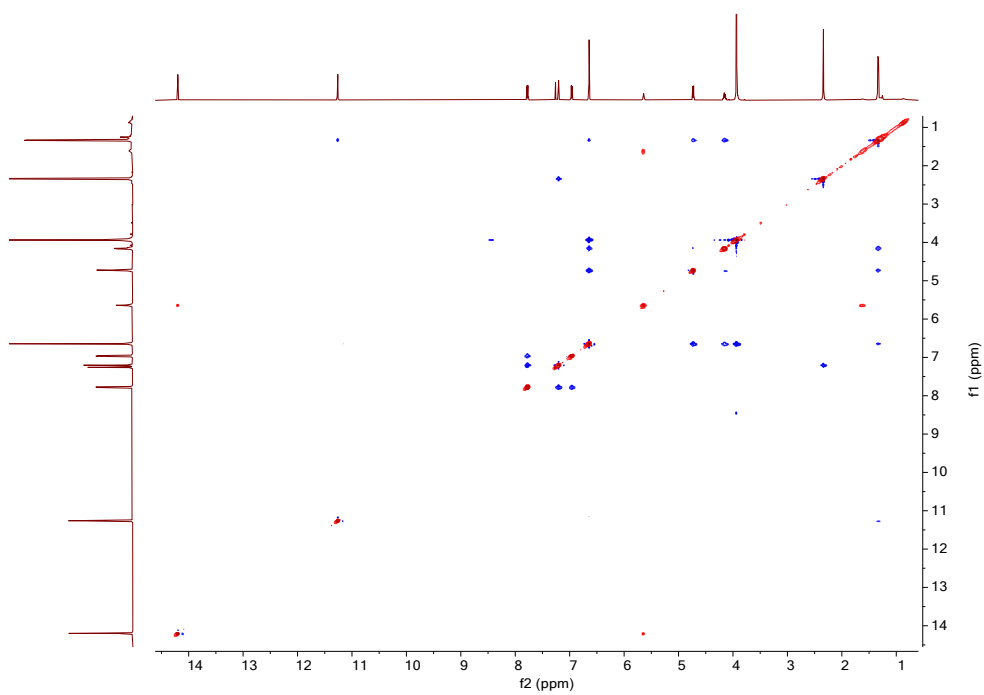

**Figure S6.** NOESY NMR spectrum of compound **1** (500 MHz, CDCl<sub>3</sub>).

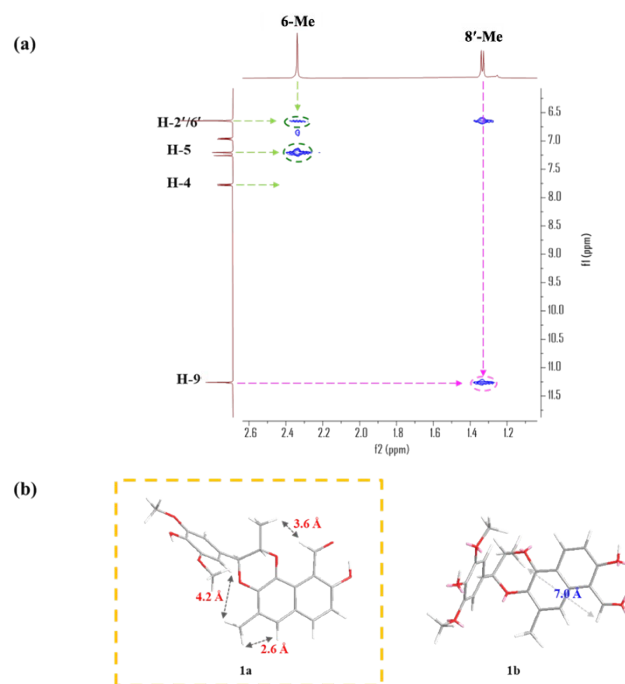

**Figure S7.** The key NOESY correlations to determine the position of methyl groups and dioxane ring position (a), and the possible structures depending on the dioxane ring position (b) in compound **1**.

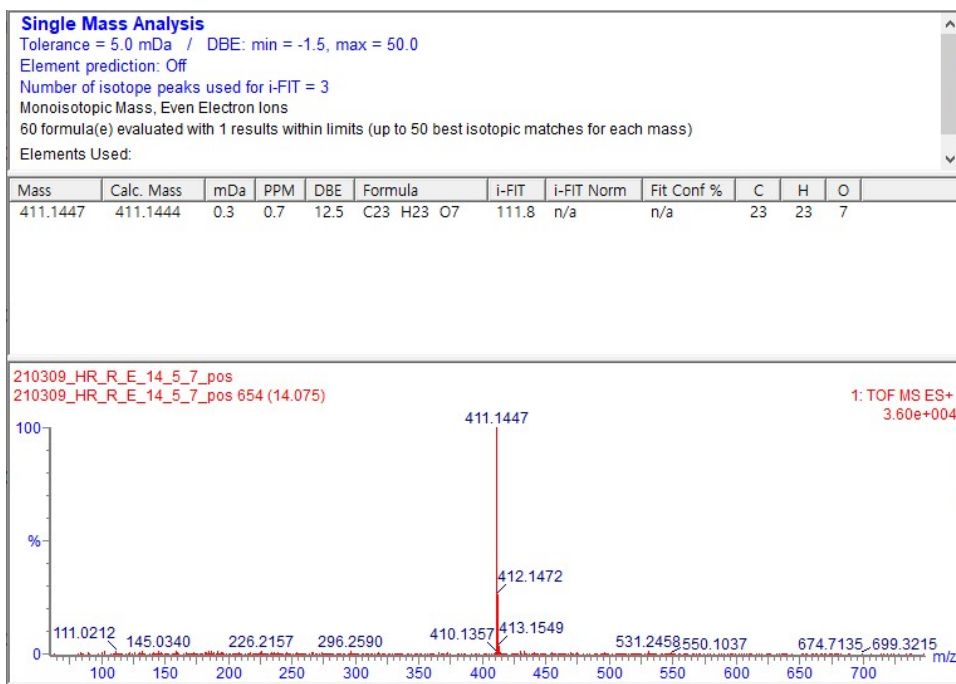

Figure S8. HRESIMS spectrum of compound 1.

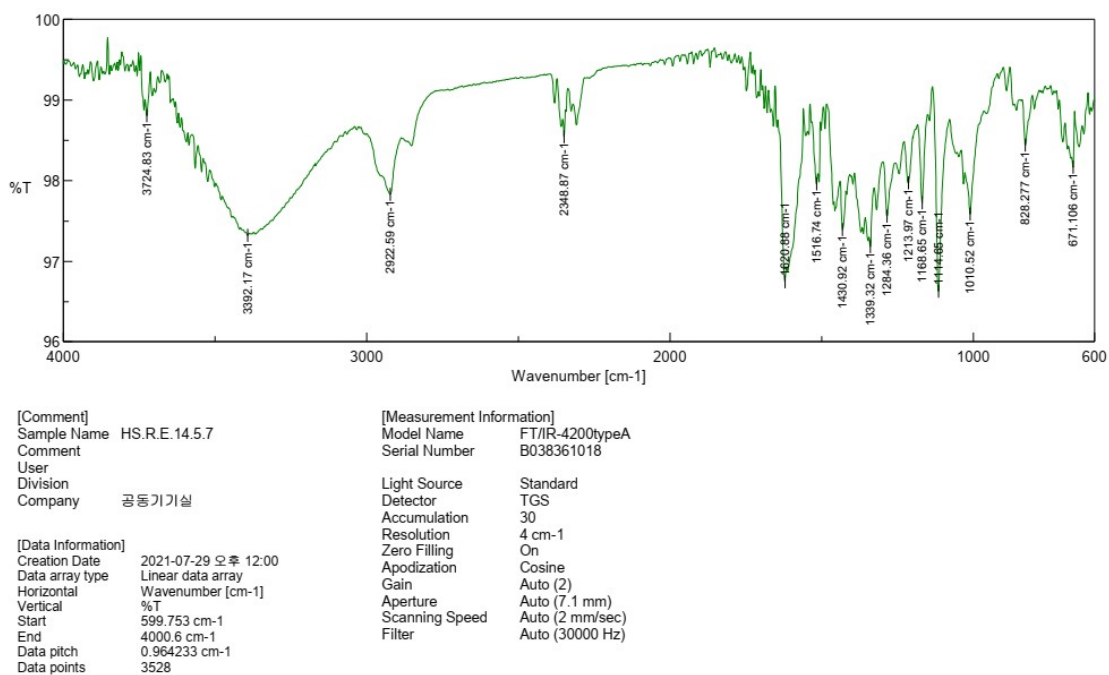

Figure S9. IR spectrum of compound 1.



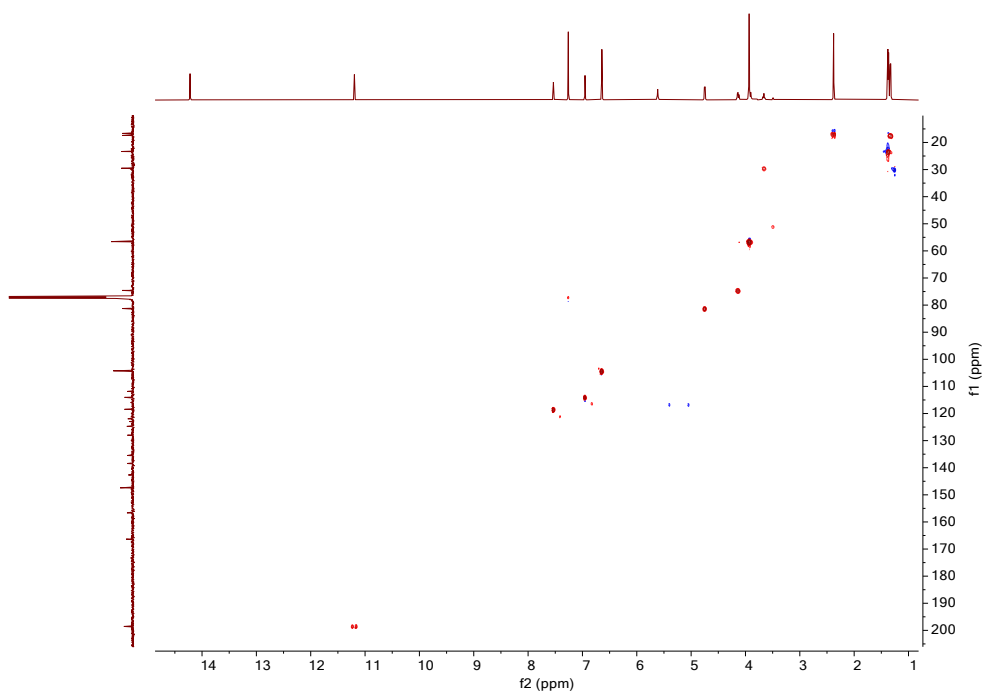

**Figure S12.** Edited HSQC NMR spectrum of compound **2** (500 MHz,  $\text{CDCl}_3$ ).

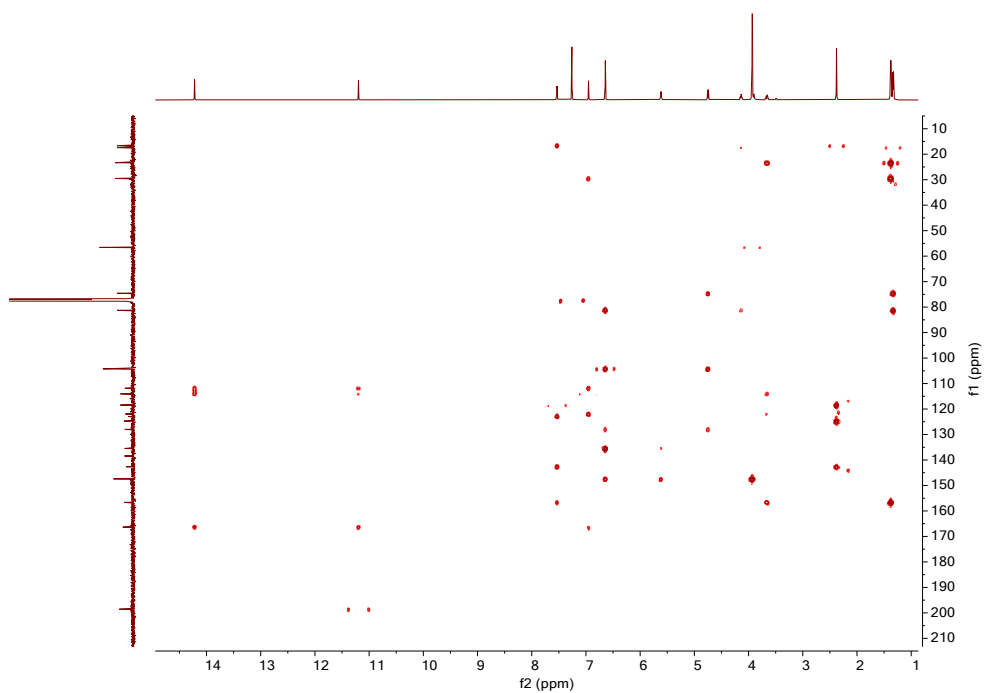

**Figure S13.** HMBC NMR spectrum of compound **2** (500 MHz,  $\text{CDCl}_3$ ).

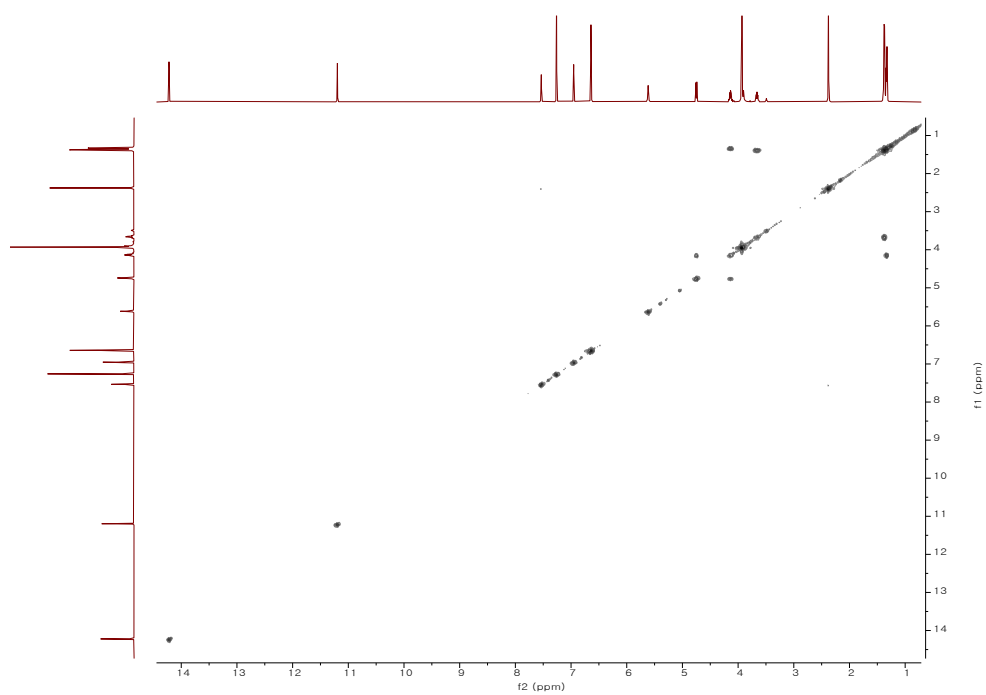

**Figure S14.** <sup>1</sup>H-<sup>1</sup>H COSY NMR spectrum of compound **2** (500 MHz, CDCl<sub>3</sub>).

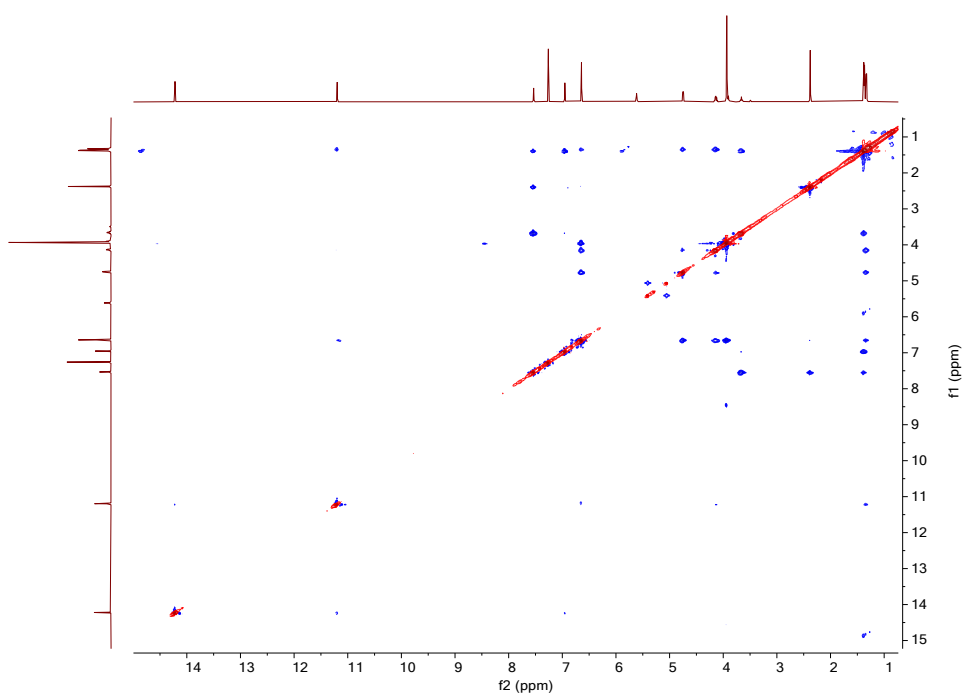

**Figure S15.** NOESY NMR spectrum of compound **2** (500 MHz, CDCl<sub>3</sub>).

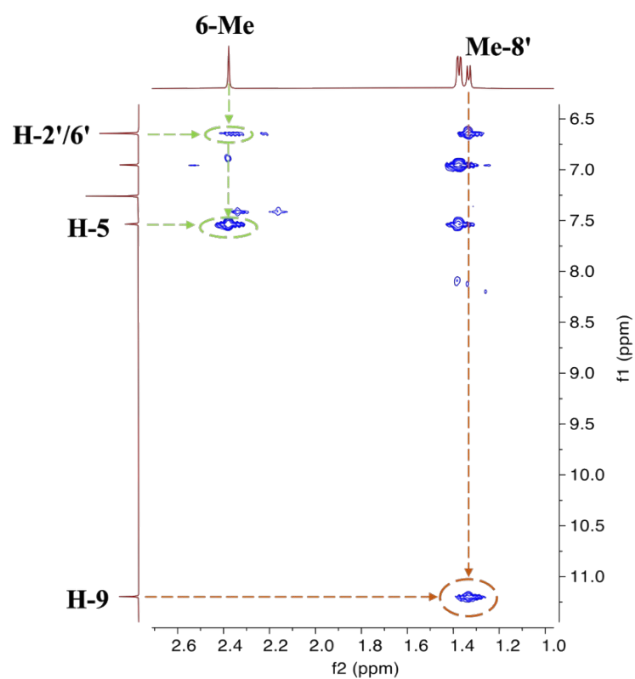

**Figure S16.** The key NOESY correlations to determine the position of methyl groups and dioxane ring position in compound **2**.

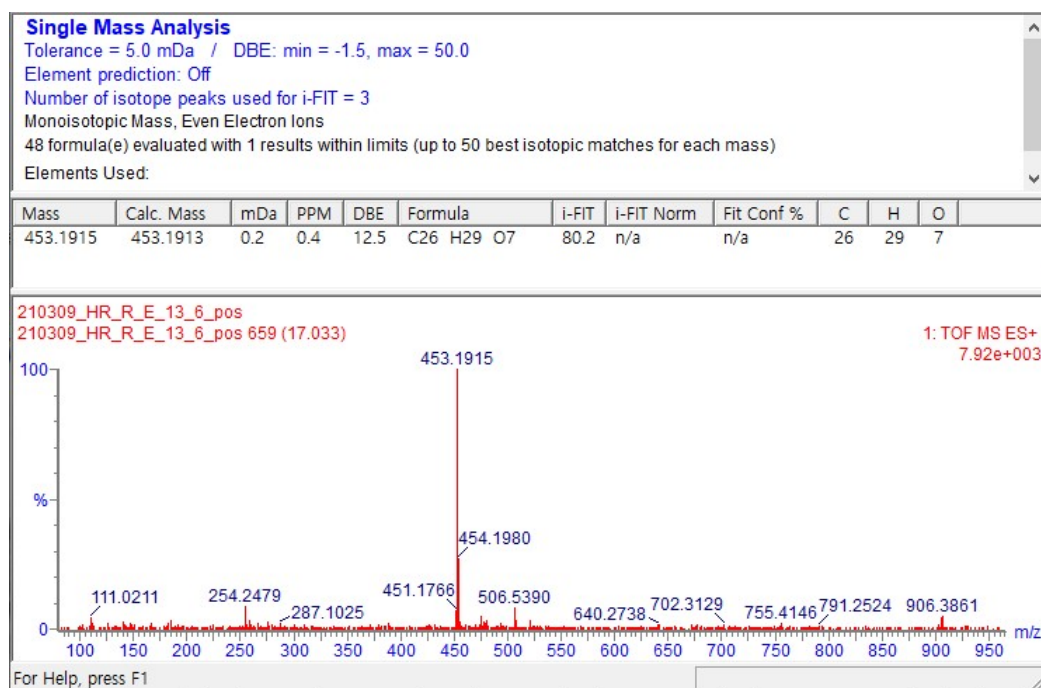

**Figure S17.** HRESIMS spectrum of compound **2**.

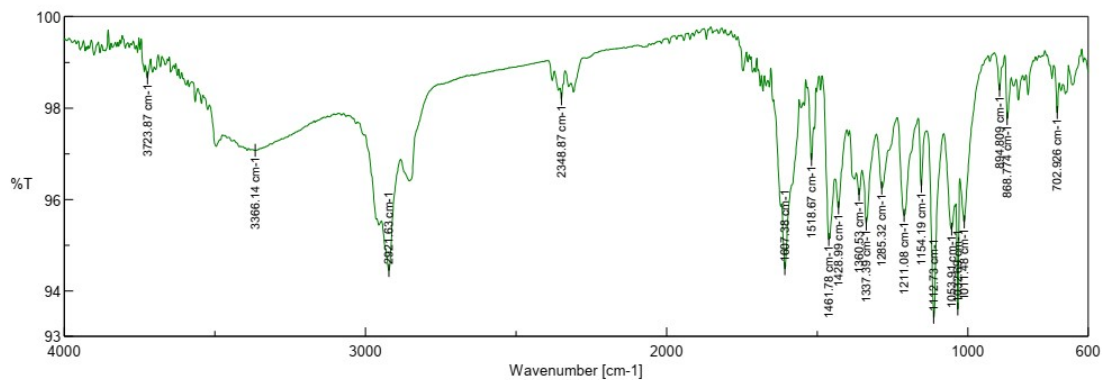

[Comment]  
 Sample Name HS.R.E.13.6.6  
 Comment  
 User  
 Division  
 Company 공동기기실

[Measurement Information]  
 Model Name FT/IR-4200typeA  
 Serial Number B038361018  
 Light Source Standard  
 Detector TGS  
 Accumulation 30  
 Resolution 4 cm-1  
 Zero Filling On  
 Apodization Cosine  
 Gain Auto (2)  
 Aperture Auto (7.1 mm)  
 Scanning Speed Auto (2 mm/sec)  
 Filter Auto (30000 Hz)

[Data Information]  
 Creation Date 2021-07-29 오후 12:04  
 Data array type Linear data array  
 Horizontal Wavenumber [cm-1]  
 Vertical %T  
 Start 599.753 cm-1  
 End 4000.6 cm-1  
 Data pitch 0.964233 cm-1  
 Data points 3528

Figure S18. IR spectrum of compound 2.



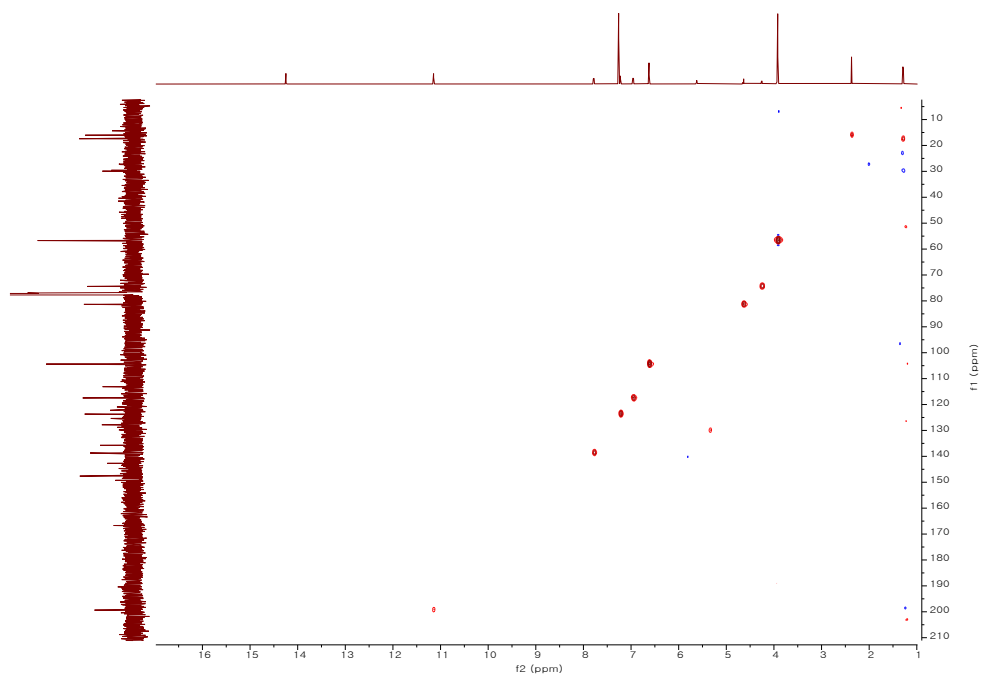

**Figure S21.** Edited HSQC NMR spectrum of compound **3** (600 MHz, CDCl<sub>3</sub>).

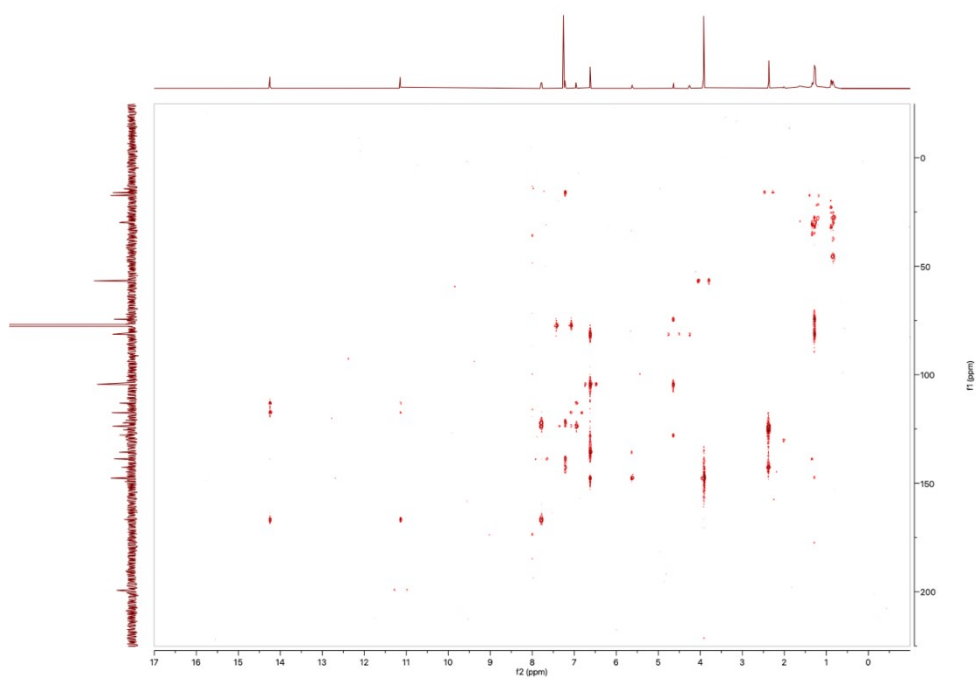

**Figure S22.** HMBC NMR spectrum of compound **3** (600 MHz, CDCl<sub>3</sub>).

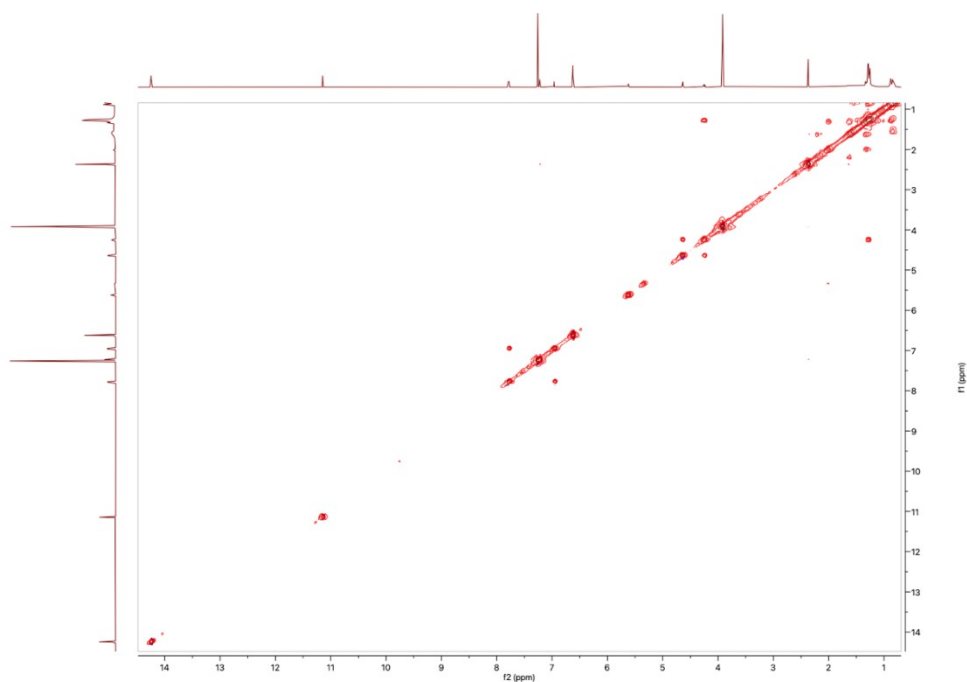

**Figure S23.**  $^1\text{H}$ - $^1\text{H}$  COSY NMR spectrum of compound **3** (600 MHz,  $\text{CDCl}_3$ ).

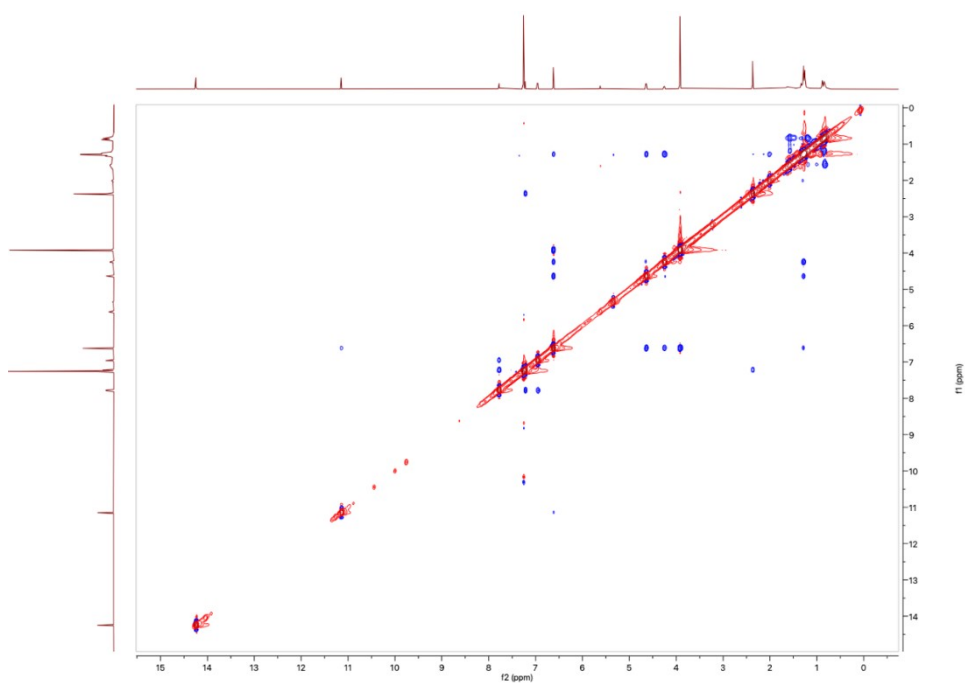

**Figure S24.** NOESY NMR spectrum of compound **3** (600 MHz,  $\text{CDCl}_3$ ).

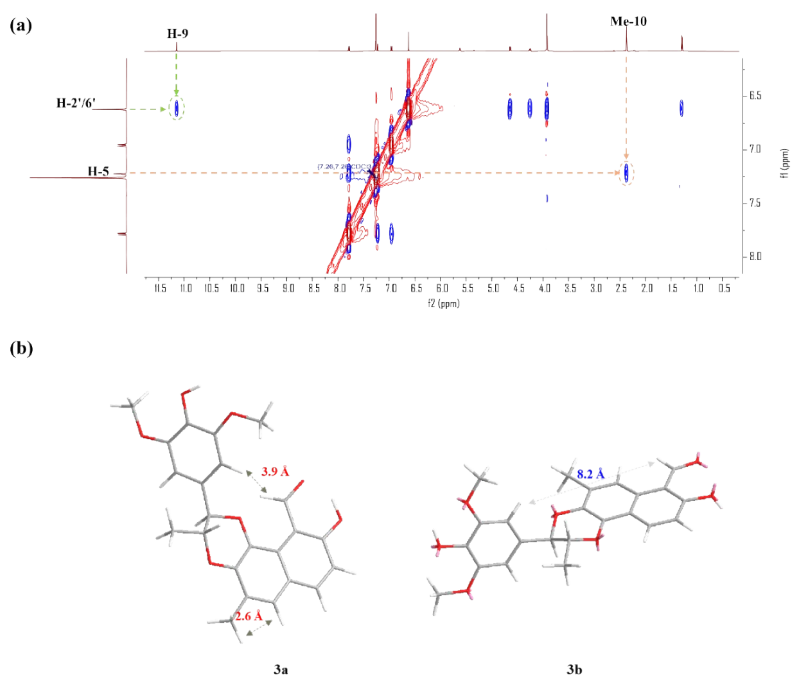

**Figure S25.** The key NOESY correlations to determine the position of the methyl group and dioxane ring position (a), and the possible structures of **3** depending on the dioxane ring position (b).

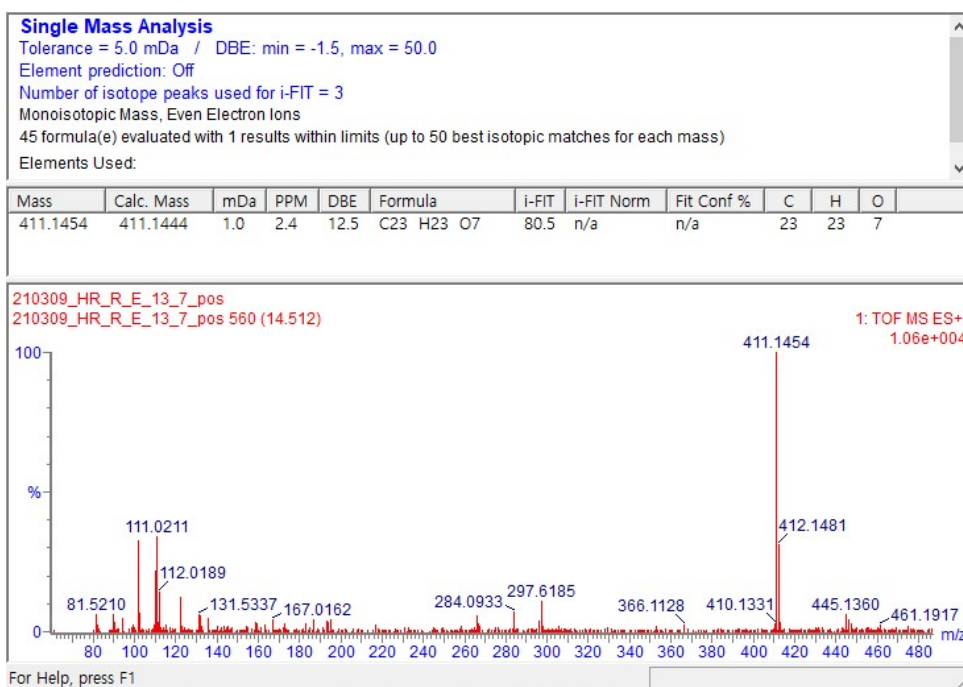

**Figure S26.** HRESIMS spectrum of compound **3**.

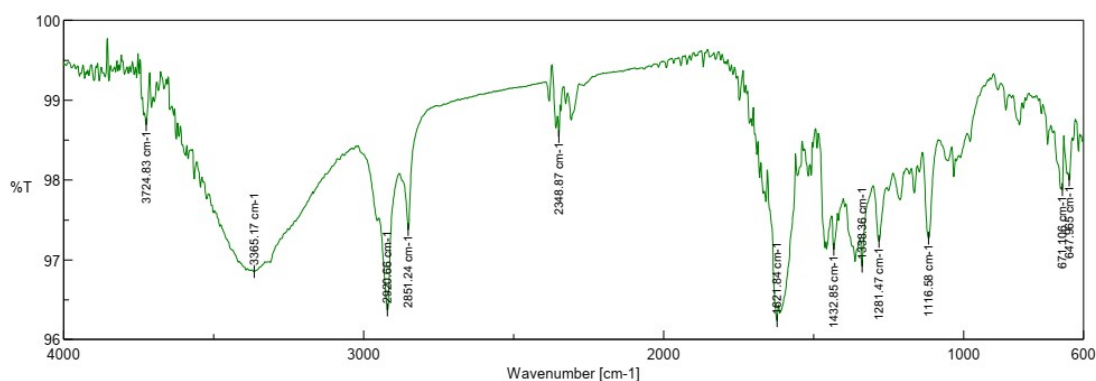

|                    |                     |                           |                 |
|--------------------|---------------------|---------------------------|-----------------|
| [Comment]          |                     | [Measurement Information] |                 |
| Sample Name        | HS.R.E.13.7.7       | Model Name                | FT/IR-4200typeA |
| Comment            |                     | Serial Number             | B038361018      |
| User               |                     | Light Source              | Standard        |
| Division           |                     | Detector                  | TGS             |
| Company            | 공통기기실               | Accumulation              | 30              |
|                    |                     | Resolution                | 4 cm-1          |
|                    |                     | Zero Filling              | On              |
| [Data Information] |                     | Apodization               | Cosine          |
| Creation Date      | 2021-07-29 오전 11:55 | Gain                      | Auto (2)        |
| Data array type    | Linear data array   | Aperture                  | Auto (7.1 mm)   |
| Horizontal         | Wavenumber [cm-1]   | Scanning Speed            | Auto (2 mm/sec) |
| Vertical           | %T                  | Filter                    | Auto (30000 Hz) |
| Start              | 599.753 cm-1        |                           |                 |
| End                | 4000.6 cm-1         |                           |                 |
| Data pitch         | 0.964233 cm-1       |                           |                 |
| Data points        | 3528                |                           |                 |

**Figure S27.** IR spectrum of compound **3**.



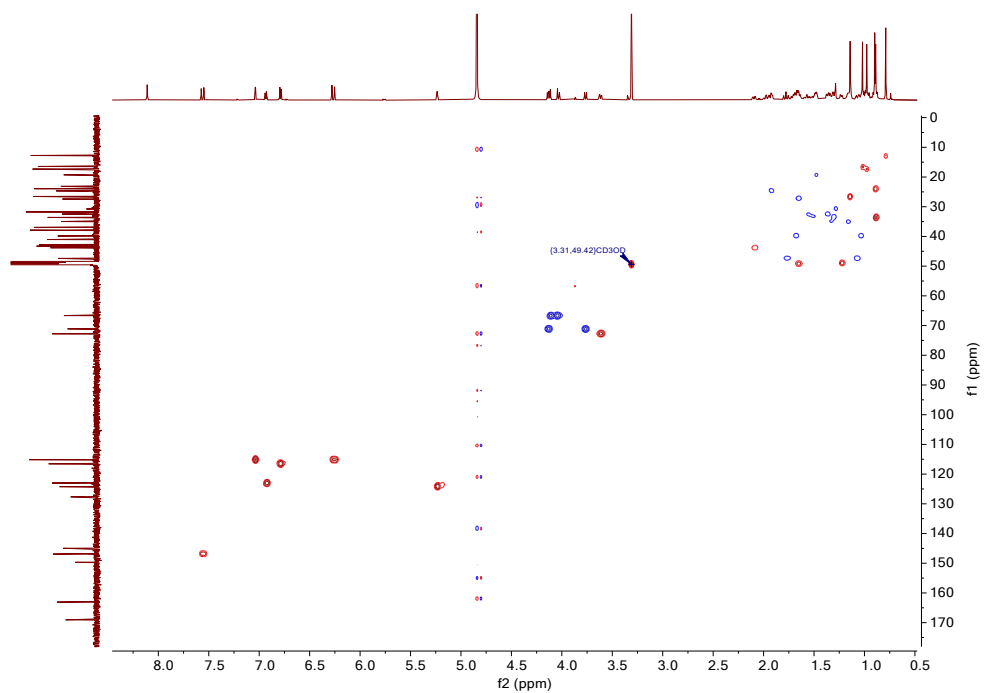

**Figure S30.** Edited HSQC NMR spectrum of compound **4** (600 MHz, CD<sub>3</sub>OD).

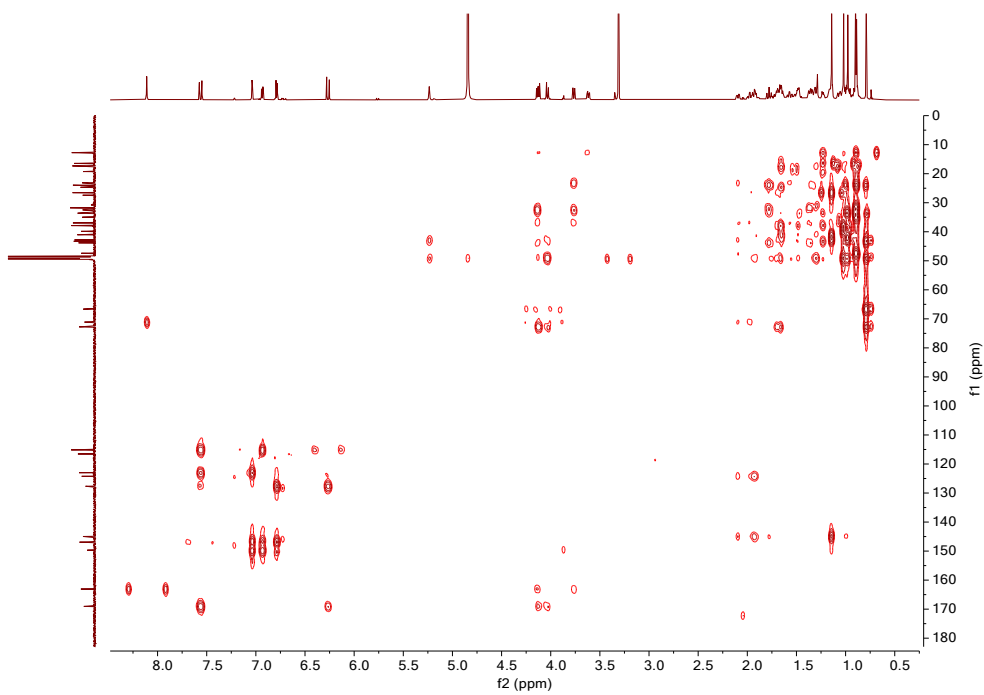

**Figure S31.** HMBC NMR spectrum of compound **4** (600 MHz, CD<sub>3</sub>OD).

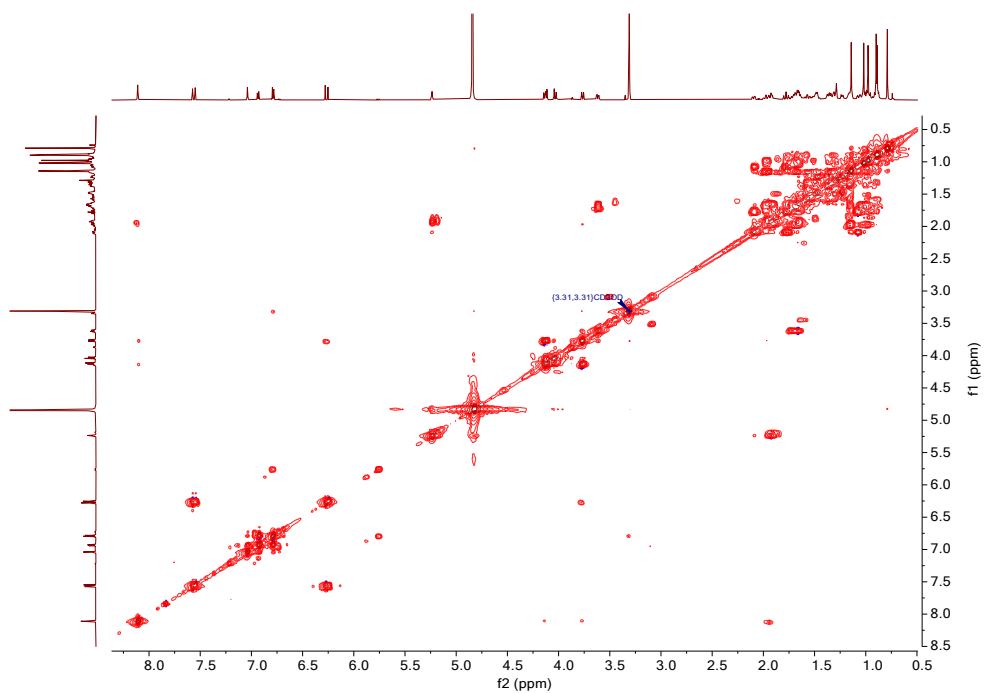

**Figure S32.** <sup>1</sup>H-<sup>1</sup>H COSY NMR spectrum of compound **4** (600 MHz, CD<sub>3</sub>OD).

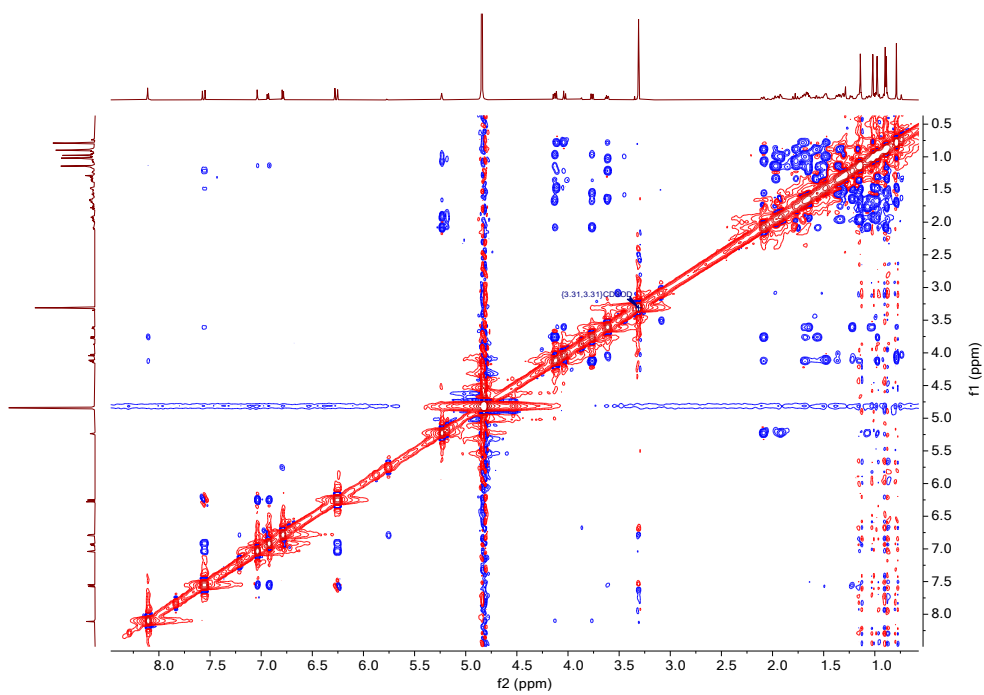

**Figure S33.** NOESY NMR spectrum of compound **4** (600 MHz, CD<sub>3</sub>OD).

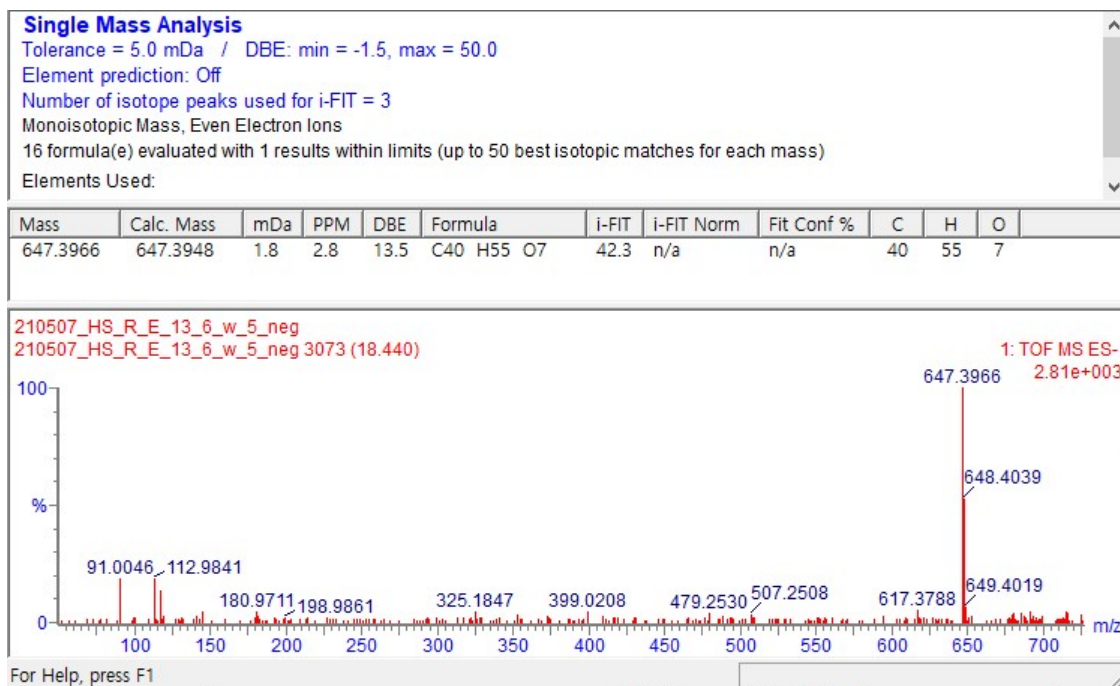

Figure S34. HRESIMS spectrum of compound 4.

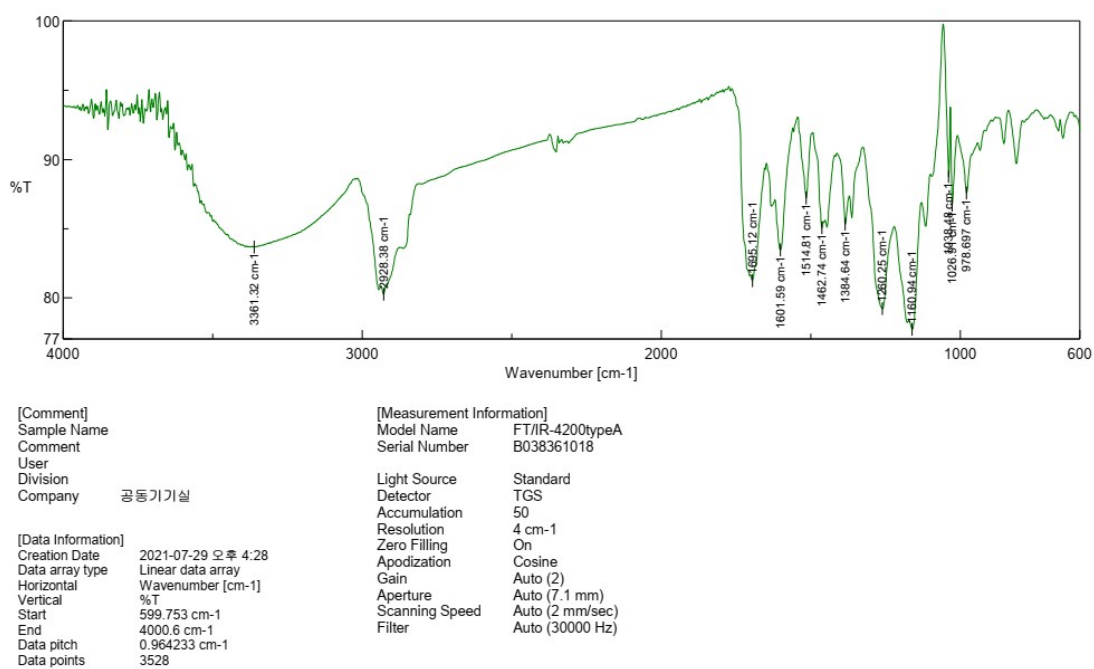

Figure S35. IR spectrum of compound 4.



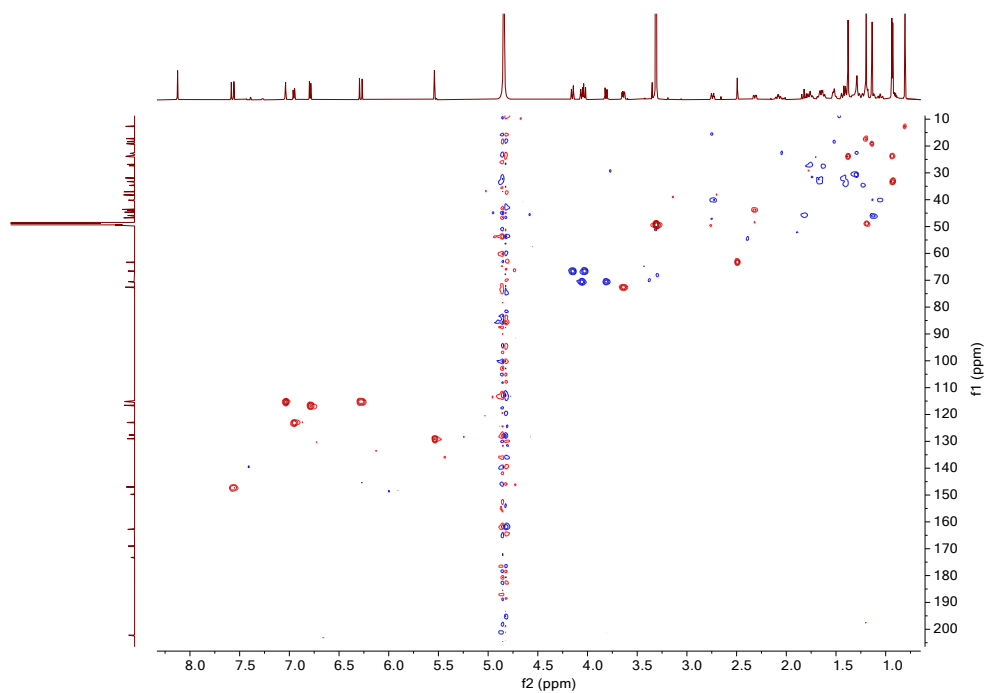

**Figure S38.** Edited HSQC NMR spectrum of compound **5** (600 MHz, CD<sub>3</sub>OD).

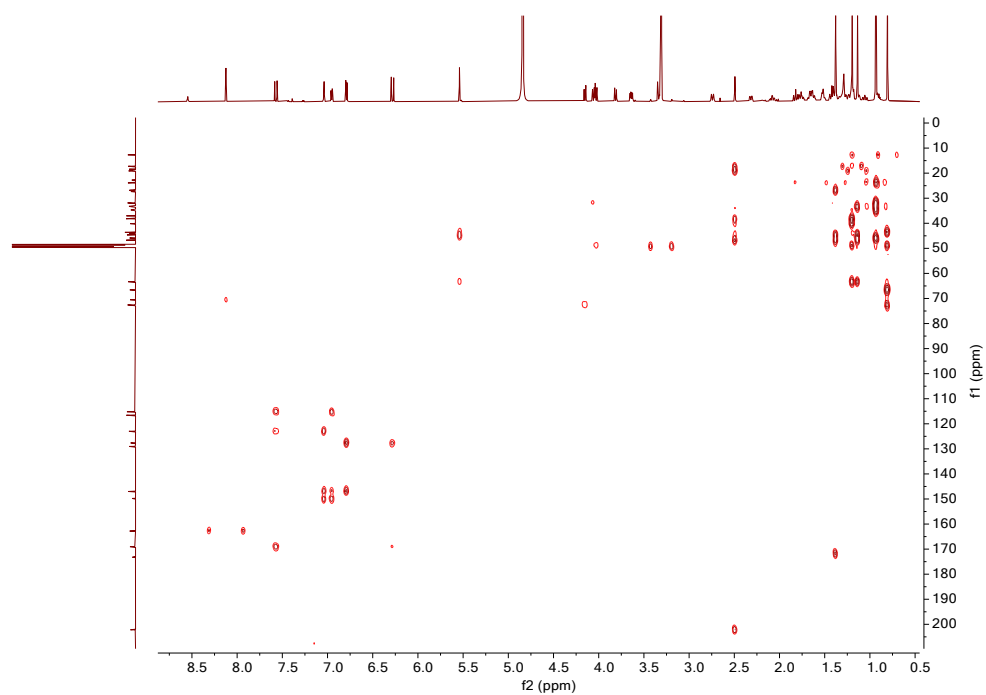

**Figure S39.** HMBC NMR spectrum of compound **5** (600 MHz, CD<sub>3</sub>OD).

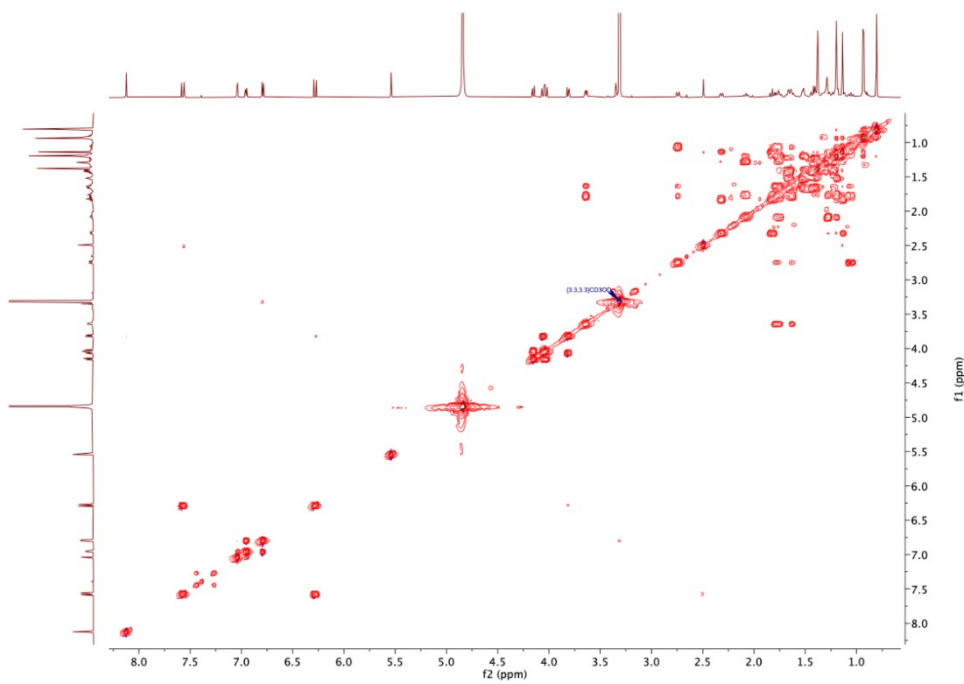

**Figure S40.**  $^1\text{H}$ - $^1\text{H}$  COSY NMR spectrum of compound **5** (600 MHz,  $\text{CD}_3\text{OD}$ ).

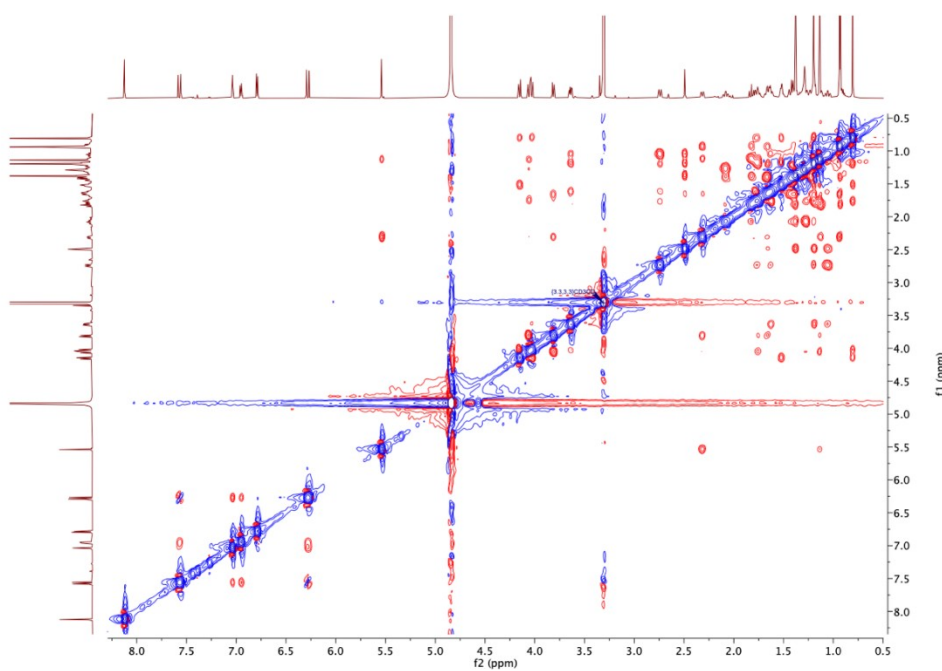

**Figure S41.** NOESY NMR spectrum of compound **5** (600 MHz,  $\text{CD}_3\text{OD}$ ).

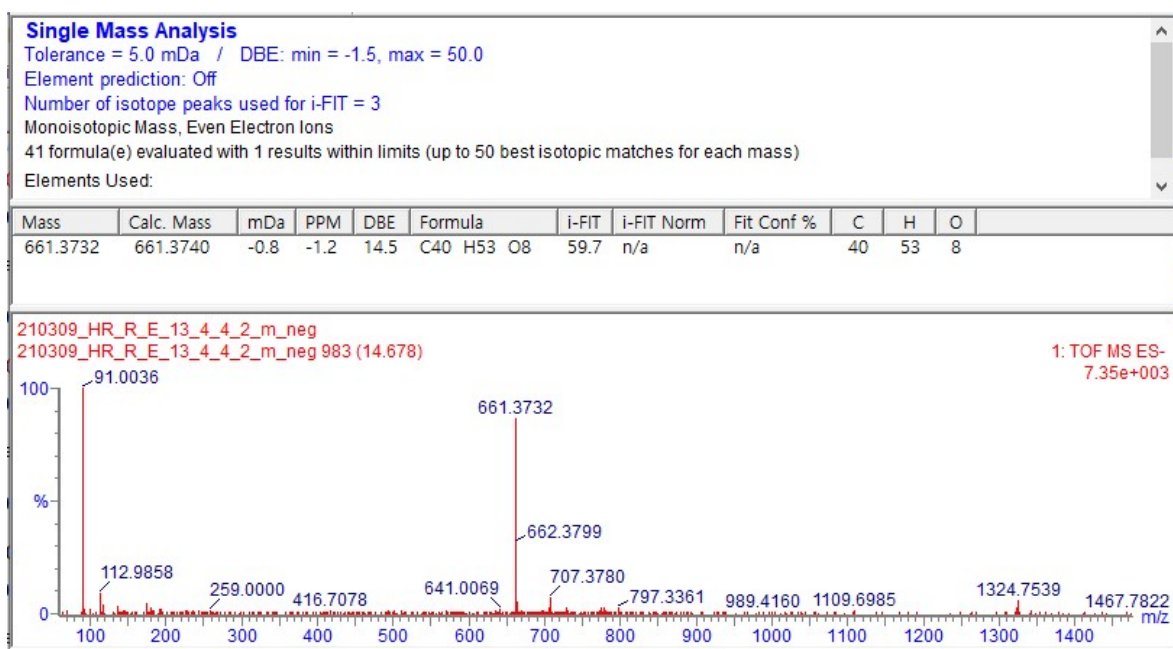

Figure S42. HRESIMS spectrum of compound 5.

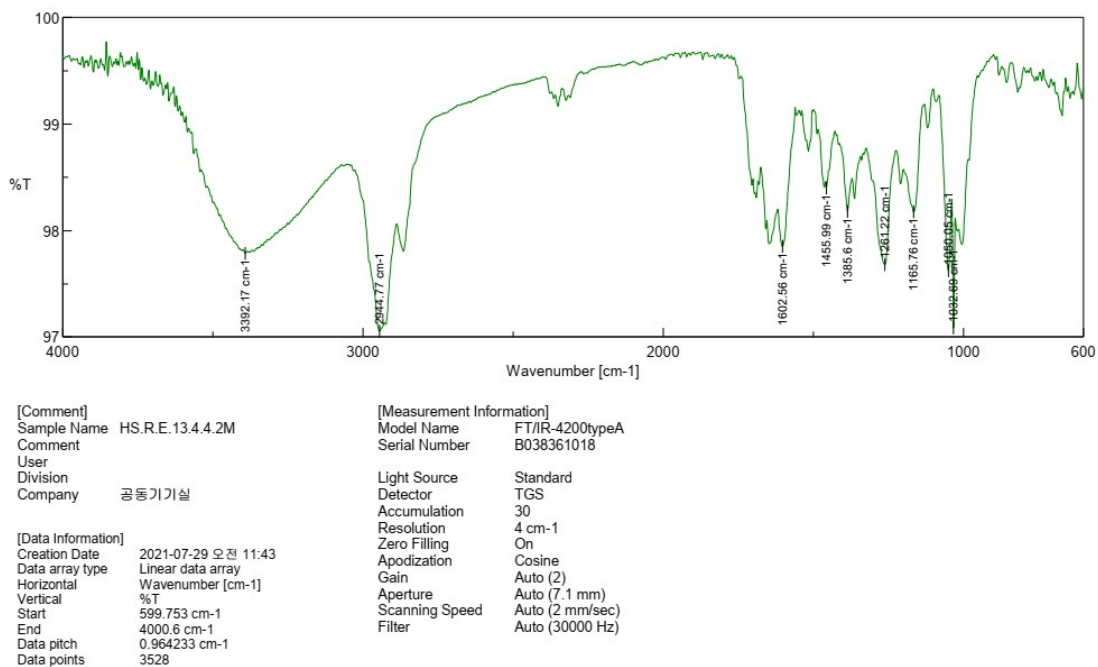

Figure S43. IR spectrum of compound 5.



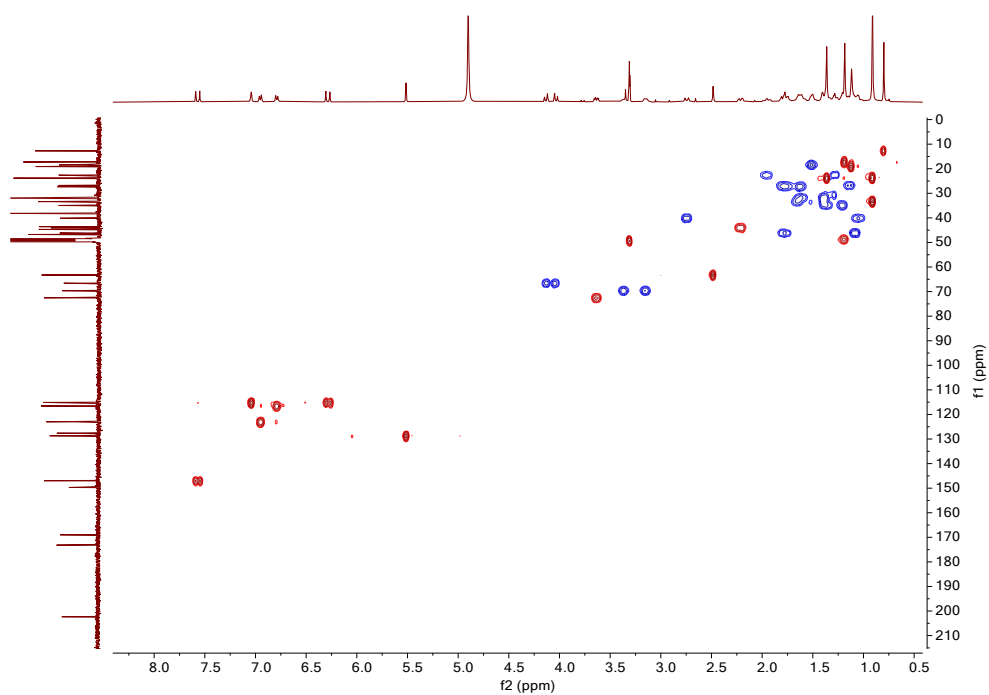

**Figure S46.** Edited HSQC NMR spectrum of compound **6** (400 MHz, CD<sub>3</sub>OD).

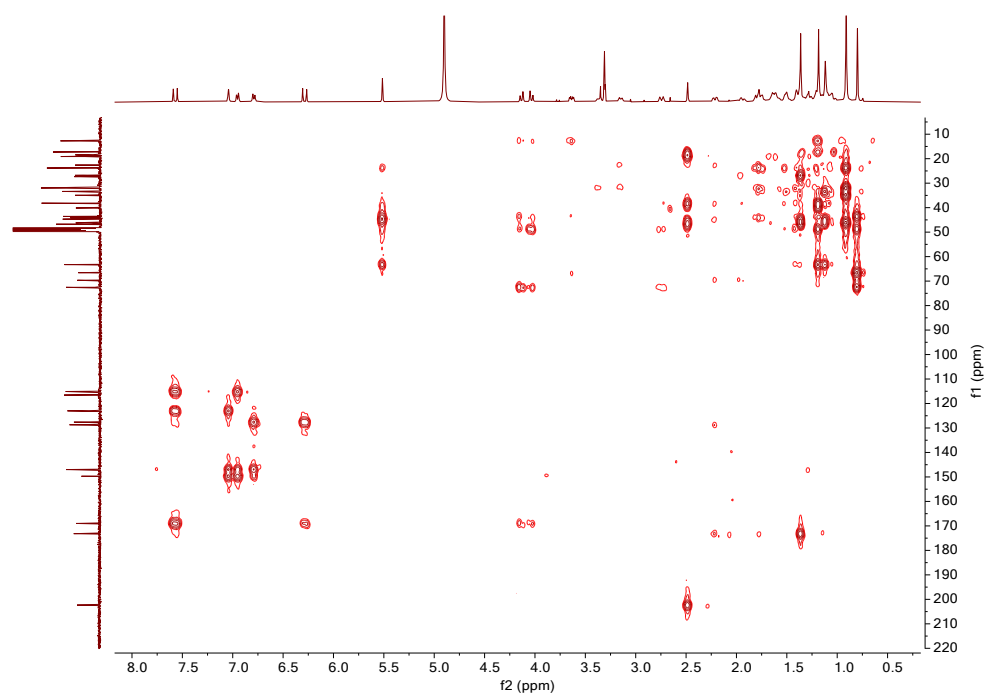

**Figure S47.** HMBC NMR spectrum of compound **6** (400 MHz, CD<sub>3</sub>OD).

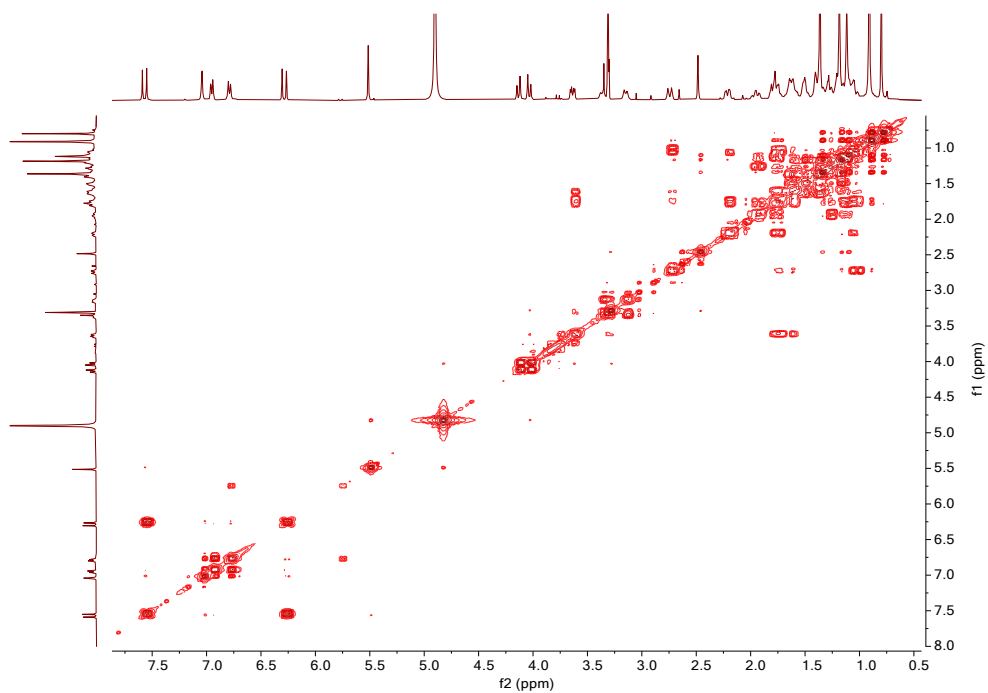

**Figure S48.** <sup>1</sup>H-<sup>1</sup>H COSY NMR spectrum of compound **6** (400 MHz, CD<sub>3</sub>OD).

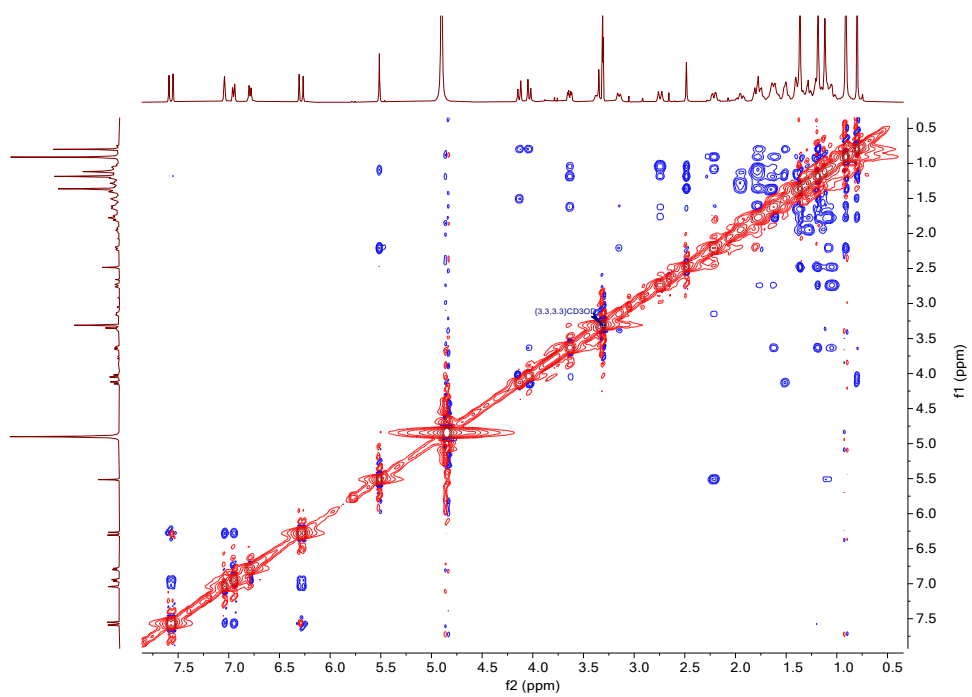

**Figure S49.** NOESY NMR spectrum of compound **6** (400 MHz, CD<sub>3</sub>OD).

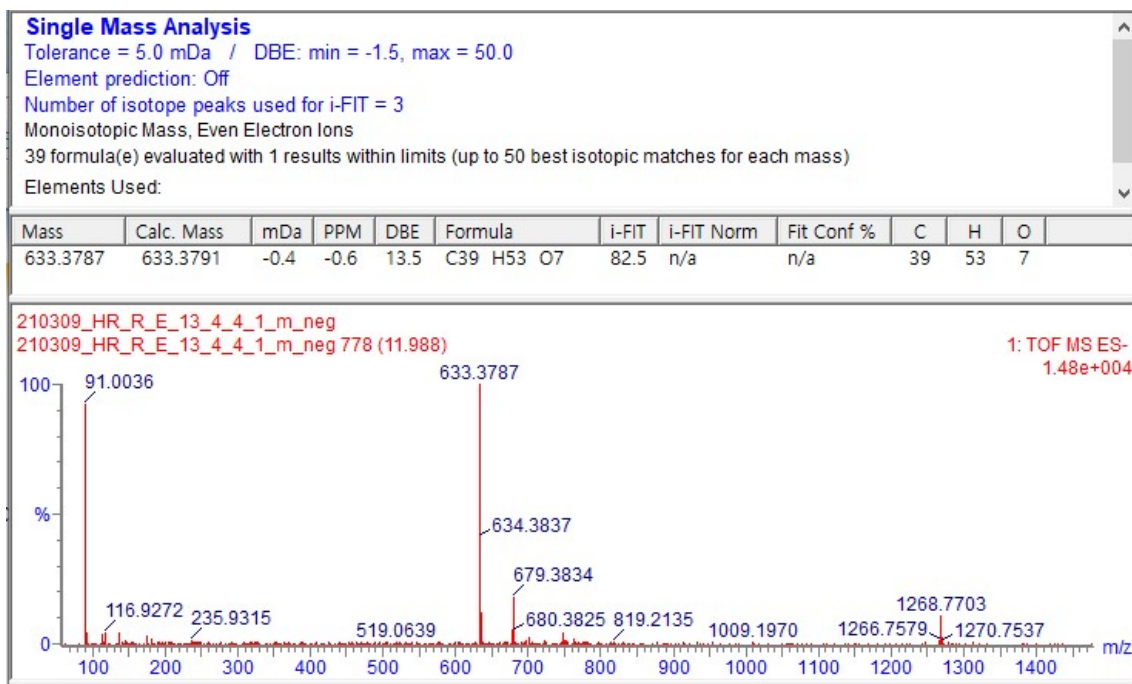

Figure S50. HRESIMS spectrum of compound 6.

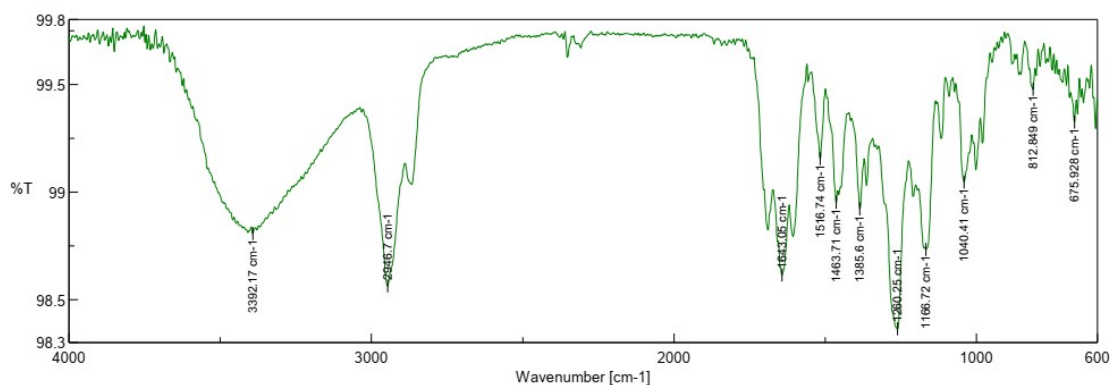

|                                   |                                |
|-----------------------------------|--------------------------------|
| [Comment]                         | [Measurement Information]      |
| Sample Name HS.R.E.13.4.4.1M      | Model Name FT/IR-4200typeA     |
| Comment                           | Serial Number B038361018       |
| User                              | Light Source Standard          |
| Division                          | Detector TGS                   |
| Company 공동기기실                     | Accumulation 30                |
| [Data Information]                | Resolution 4 cm-1              |
| Creation Date 2021-07-29 오전 11:32 | Zero Filling On                |
| Data array type Linear data array | Apodization Cosine             |
| Horizontal Wavenumber [cm-1]      | Gain Auto (2)                  |
| Vertical %T                       | Aperture Auto (7.1 mm)         |
| Start 599.753 cm-1                | Scanning Speed Auto (2 mm/sec) |
| End 4000.6 cm-1                   | Filter Auto (30000 Hz)         |
| Data pitch 0.964233 cm-1          |                                |
| Data points 3528                  |                                |

Figure S51. IR spectrum of compound 6.

## 2. Supplemental ECD calculation

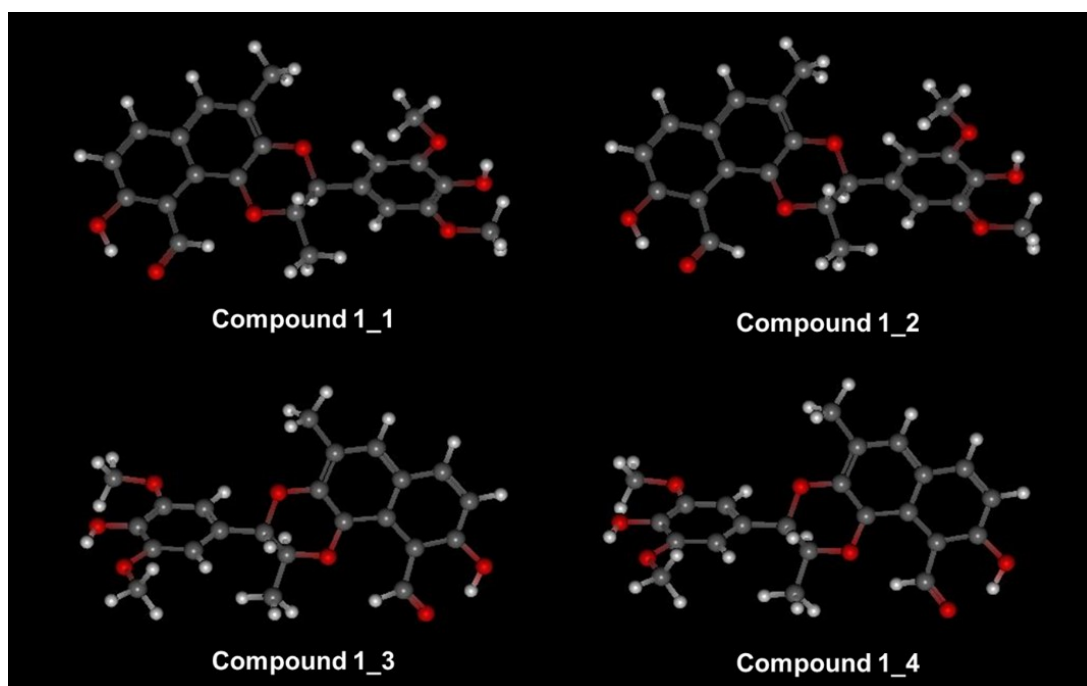

Figure S52. 3D structural models of the minimized main conformers for compound 1.

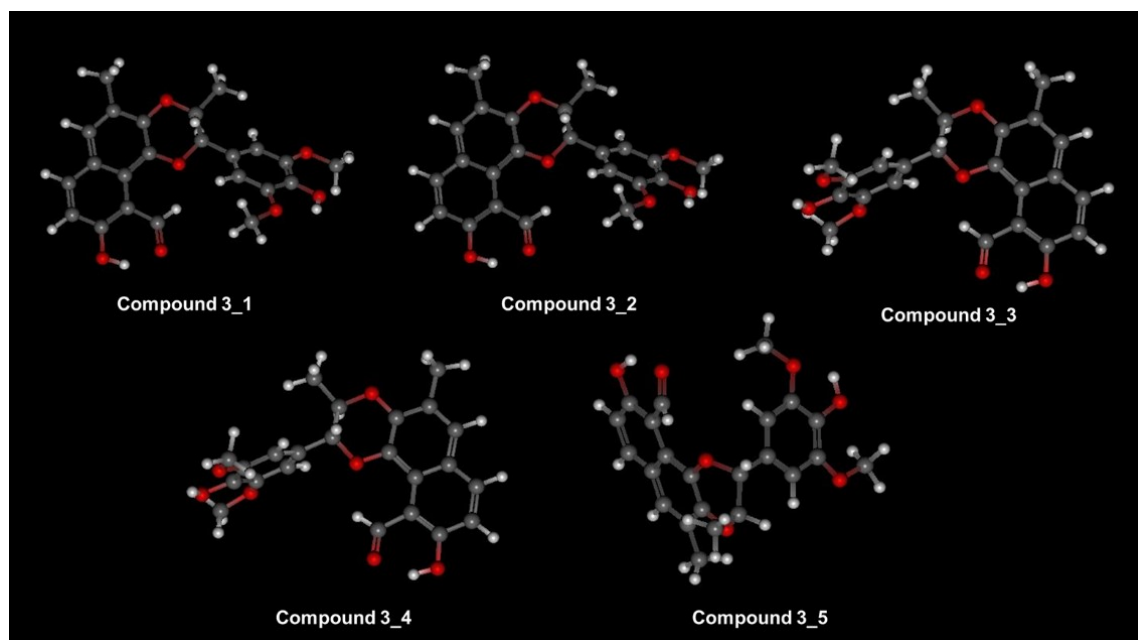

Figure S53. 3D structural models of the minimized main conformers for compound 3.

### 3. Supplemental biological data

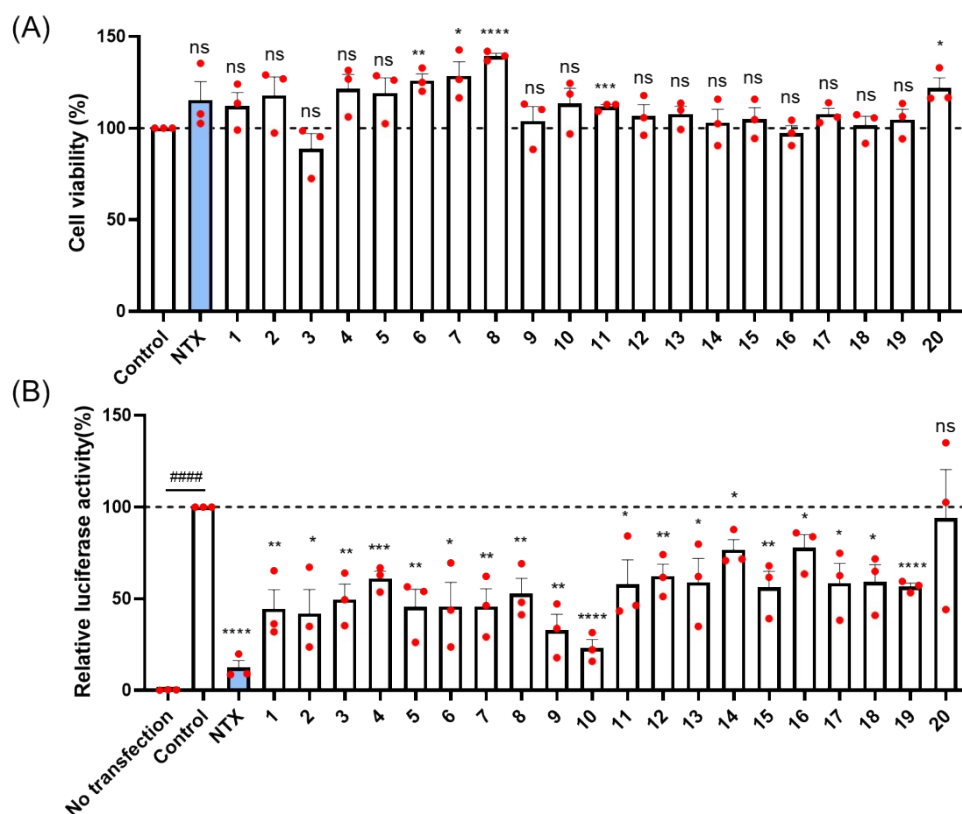

**Figure S54.** Effects of compounds isolated from *H. syriacus* on  $p16^{INK4A}$  promoter activity.

(A) Cell viability of the isolated compounds (1–20) was determined by MTT assay. Results are expressed as relative viability (%) compared to the untreated control group (set at 100%). (B) Inhibitory effects of the compounds (10  $\mu$ M) on  $p16^{INK4A}$  promoter activity. A549 cells were co-transfected with a pGL3- $p16^{INK4A}$  reporter plasmid encoding the  $p16^{INK4A}$  promoter and a pSV- $\beta$ -galactosidase plasmid as an internal control for 7 h. After transfection, cells were treated with each compound (10  $\mu$ M) or navitoclax (NTX, 1  $\mu$ M; positive control) for 20 h. Luciferase activity was measured using a luminescence reader and normalized to  $\beta$ -galactosidase activity. Data represent mean  $\pm$  SEM ( $n = 3$ ). Statistical significance was determined using Student's *t*-test (\* $p < 0.05$ , \*\* $p < 0.01$ , \*\*\* $p < 0.001$  and \*\*\*\* $p < 0.0001$  vs. untreated control; ##### $p < 0.0001$  vs. no-transfection control).

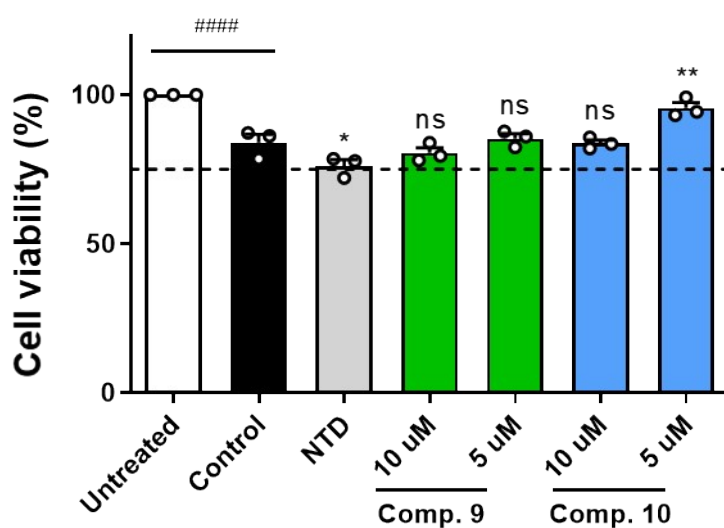

**Figure S55.** Cell viability of bleomycin-induced IMR-90 fibroblast treated with compounds **9** and **10**.

*IMR90 cells were exposed to bleomycin (BLM, 40  $\mu\text{g}/\text{mL}$ ) for 2 days and then treated with the indicated compounds or NTD (nintedanib, 5  $\mu\text{M}$ ; positive control) for an additional 2 days (Control). Cell viability was quantified using the MTT assay and expressed as percentage relative to untreated cells. Data are presented as mean  $\pm$  SEM ( $n = 3$ ). Statistical significance was determined using one-way ANOVA followed by Dunn's multiple comparisons test (#### $p < 0.0001$  vs. untreated; \* $p < 0.05$  and \*\* $p < 0.0001$  vs. BLM-treated (control) group).*

#### 4. Supplemental tables

**Table S1.** <sup>1</sup>H and <sup>13</sup>C NMR spectroscopic data for compounds **1–3**.

| pos.       | <b>1</b> <sup>a</sup>                 |                     | <b>2</b> <sup>a</sup>                 |                     | <b>3</b> <sup>b</sup>                 |                     |
|------------|---------------------------------------|---------------------|---------------------------------------|---------------------|---------------------------------------|---------------------|
|            | $\delta_{\text{H}}$ ( <i>J</i> in Hz) | $\delta_{\text{C}}$ | $\delta_{\text{H}}$ ( <i>J</i> in Hz) | $\delta_{\text{C}}$ | $\delta_{\text{H}}$ ( <i>J</i> in Hz) | $\delta_{\text{C}}$ |
| 1          |                                       | 113.1               |                                       | 111.8               |                                       | 113.0               |
| 2          |                                       | 166.5               |                                       | 166.3               |                                       | 166.6               |
| 3          | 6.96, d (8.9)                         | 117.3               | 6.95, s                               | 114.0               | 6.96, d (9.1)                         | 117.4               |
| 4          | 7.78, d (8.9)                         | 138.6               |                                       | 156.6               | 7.78, d (9.1)                         | 138.6               |
| 4a         |                                       | 123.8               |                                       | 121.9               |                                       | 123.7               |
| 5          | 7.20, s                               | 123.4               | 7.53, s                               | 118.5               | 7.22, s                               | 123.6               |
| 6          |                                       | 125.4               |                                       | 124.8               |                                       | 125.3               |
| 7          |                                       | 143.2               |                                       | 142.7               |                                       | 142.6               |
| 8          |                                       | 137.9               |                                       | 138.4               |                                       | 138.6               |
| 8a         |                                       | 122.1               |                                       | 123.0               |                                       | 122.2               |
| 9          | 11.26, s                              | 199.1               | 11.20, s                              | 198.6               | 11.15, s                              | 199.3               |
| 10         |                                       |                     | 3.66, m                               | 29.5                |                                       |                     |
| 11,12      |                                       |                     | 1.37, d (6.8)                         | 23.3                |                                       |                     |
| 1□         |                                       | 127.9               |                                       | 128.0               |                                       | 127.7               |
| 2□, 6□     | 6.64, s                               | 104.3               | 6.64, s                               | 104.2               | 6.62, s                               | 104.3               |
| 3□, 5□     |                                       | 147.4               |                                       | 147.4               |                                       | 147.6               |
| 4□         |                                       | 135.5               |                                       | 135.5               |                                       | 135.7               |
| 7□         | 4.73 d (8.0)                          | 81.2                | 4.75 d (7.9)                          | 81.3                | 4.64 d (7.9)                          | 81.3                |
| 8□         | 4.15 m                                | 74.5                | 4.14, m                               | 74.6                | 4.25, m                               | 74.3                |
| 2-OH       | 14.20, s                              |                     | 14.22, s                              |                     | 14.25, s                              |                     |
| 6-Me       | 2.34, s                               | 16.1                | 2.38, s                               | 16.7                | 2.37, s                               | 16.0                |
| 8□-Me      | 1.33, d (6.2)                         | 17.4                | 1.33, d (6.5)                         | 17.4                | 1.29, d (6.3)                         | 17.3                |
| 3□, 5□-OMe | 3.93, s                               | 56.6                | 3.93, s                               | 56.6                | 3.92, s                               | 56.6                |
| 4□-OH      | 5.64, s                               |                     | 5.62, s                               |                     | 5.62, s                               |                     |

<sup>a</sup>Recorded in CDCl<sub>3</sub> at 500 MHz for <sup>1</sup>H and 125MHz for <sup>13</sup>C. <sup>b</sup>Recorded in CDCl<sub>3</sub> at 600 MHz for <sup>1</sup>H and 150MHz for <sup>13</sup>C.

1 **Table S2.** <sup>1</sup>H and <sup>13</sup>C NMR spectroscopic data for compounds **4–6**.

| pos. | <b>4<sup>a</sup></b>             |                     | <b>5<sup>a</sup></b>                         |                     | <b>6<sup>b</sup></b>                      |                     |
|------|----------------------------------|---------------------|----------------------------------------------|---------------------|-------------------------------------------|---------------------|
|      | $\delta_{\text{H}}$ (J in Hz)    | $\delta_{\text{C}}$ | $\delta_{\text{H}}$ (J in Hz)                | $\delta_{\text{C}}$ | $\delta_{\text{H}}$ (J in Hz)             | $\delta_{\text{C}}$ |
| 1    | 1.03, m<br>1.66, m               | 39.8                | 1.04, td (13.5, 3.1)<br>2.74, td (13.5, 3.5) | 40.1                | 1.05 <sup>c</sup><br>2.74, td (13.5, 3.6) | 40.1                |
| 2    | 1.67, m                          | 27.4                | 1.65 <sup>c</sup><br>1.77 <sup>c</sup>       | 27.3                | 1.62 <sup>c</sup><br>1.78 <sup>c</sup>    | 27.3                |
| 3    | 3.62, d (11.8, 4.5)              | 72.8                | 3.64, dd (11.9, 4.6)                         | 72.6                | 3.64, dd (11.7, 4.6)                      | 72.5                |
| 4    |                                  | 43.3                |                                              | 43.6                |                                           | 43.6                |
| 5    | 1.23, dd (8.6, 4.4)              | 48.0                | 1.19 <sup>c</sup>                            | 49.0                | 1.18 <sup>c</sup>                         | 49.0                |
| 6    | 1.47, m                          | 19.3                | 1.52, m                                      | 18.4                | 1.51, m                                   | 18.4                |
| 7    | 1.29, m<br>1.47, m               | 33.4                | 1.40, m <sup>c</sup><br>1.65, m <sup>c</sup> | 33.4                | 1.39 <sup>c</sup><br>1.64 <sup>c</sup>    | 33.4                |
| 8    |                                  | 41.0                |                                              | 46.7                |                                           | 46.8                |
| 9    | 1.64, m <sup>c</sup>             | 49.4                | 2.49, s                                      | 63.3                | 2.48, s                                   | 63.3                |
| 10   |                                  | 37.9                |                                              | 38.2                |                                           | 38.2                |
| 11   | 1.93, m <sup>c</sup>             | 24.7                |                                              | 202.2               |                                           | 202.3               |
| 12   | 5.24, t (3.7)                    | 124.2               | 5.54, s                                      | 129.0               | 5.56, s                                   | 128.7               |
| 13   |                                  | 145.0               |                                              | 173.2               |                                           | 173.2               |
| 14   |                                  | 42.8                |                                              | 44.6                |                                           | 44.7                |
| 15   | 0.88, m<br>1.65, m               | 26.6                | 1.19, m <sup>c</sup><br>1.76, m <sup>c</sup> | 26.8                | 1.15 <sup>c</sup><br>1.78 <sup>c</sup>    | 26.8                |
| 16   | 1.16, m<br>1.97, m               | 23.2                | 1.29 <sup>c</sup><br>2.08, td (14.0, 4.7)    | 22.8                | 1.29, m<br>1.95, dt (13.6, 6.9)           | 22.6                |
| 17   |                                  | 37.0                |                                              | 37.0                |                                           | 38.2                |
| 18   | 2.10, dd (13.6, 4.6)             | 43.8                | 2.32, dd (13.6, 3.9)                         | 44.0                | 2.21, dd (13.5, 4.4)                      | 44.1                |
| 19   | 1.07, m<br>1.78, t (13.6)        | 47.4                | 1.12 <sup>c</sup><br>1.82, t (13.5)          | 45.9                | 1.09 <sup>c</sup><br>1.78 <sup>c</sup>    | 46.2                |
| 20   |                                  | 31.8                |                                              | 31.9                |                                           | 32.0                |
| 21   | 1.16, m<br>1.34, m               | 35.0                | 1.25 <sup>c</sup><br>1.40 <sup>c</sup>       | 34.7                | 1.21 <sup>c</sup><br>1.39 <sup>c</sup>    | 34.9                |
| 22   | 1.37, m<br>1.56, m               | 32.5                | 1.42 <sup>c</sup><br>1.65 <sup>c</sup>       | 31.9                | 1.39 <sup>c</sup><br>1.65 <sup>c</sup>    | 31.7                |
| 23   | 4.03, d (11.3)<br>4.14, d (11.3) | 66.6                | 4.03, d (11.4)<br>4.15, d (11.4)             | 66.6                | 4.03, d (11.4)<br>4.13, d (11.4)          | 66.6                |
| 24   | 0.79, s                          | 12.8                | 0.81, s                                      | 12.7                | 0.80, s                                   | 12.7                |
| 25   | 1.02, s                          | 16.4                | 1.20, s                                      | 17.2                | 1.18, s                                   | 17.3                |
| 26   | 0.98, s                          | 17.3                | 1.14, s                                      | 19.1                | 1.12, s                                   | 19.1                |
| 27   | 1.14, s                          | 26.5                | 1.38, s                                      | 23.9                | 1.39, s                                   | 23.8                |
| 28   | 3.77, d (11.0)<br>4.12, d (11.0) | 71.1                | 3.81, d (11.3)<br>4.06, d (11.3)             | 70.5                | 3.15, d (11.4)<br>3.36, d (11.4)          | 69.7                |
| 29   | 0.89, s                          | 33.6                | 0.93, s                                      | 33.2                | 0.91, s                                   | 33.4                |
| 30   | 0.90, s                          | 23.9                | 0.94, s                                      | 23.7                | 0.91, s                                   | 23.8                |
| 1□   |                                  | 127.7               |                                              | 127.6               |                                           | 127.6               |
| 2□   | 7.04, d (2.0)                    | 115.1               | 7.04, d (2.1)                                | 115.2               | 7.04, d (2.0)                             | 115.2               |
| 3□   |                                  | 146.9               |                                              | 147.0               |                                           | 146.9               |
| 4□   |                                  | 149.7               |                                              | 149.8               |                                           | 149.7               |
| 5□   | 6.79, d (8.2)                    | 116.5               | 6.79, d (8.2)                                | 116.6               | 6.79, d (7.9)                             | 116.6               |
| 6□   | 6.93, dd (8.2, 2.0)              | 123.0               | 6.95, dd (8.2, 2.1)                          | 123.0               | 6.95, dd (7.9, 2.0)                       | 123.0               |
| 7□   | 7.56, d (15.8)                   | 146.9               | 7.57, d (15.7)                               | 147.0               | 7.57, d (15.8)                            | 147.0               |
| 8□   | 6.27, d (15.8)                   | 115.1               | 6.28, d (15.7)                               | 115.1               | 6.29, d (15.8)                            | 115.1               |

|   |                                                                                                                                                                                                                          |         |       |         |       |  |       |
|---|--------------------------------------------------------------------------------------------------------------------------------------------------------------------------------------------------------------------------|---------|-------|---------|-------|--|-------|
|   | 9□                                                                                                                                                                                                                       |         | 169.1 |         | 169.0 |  | 169.0 |
|   | 28-COH                                                                                                                                                                                                                   | 8.11, s | 163.1 | 8.12, s | 162.8 |  |       |
| 2 | <sup>a</sup> Recorded in methanol- <i>d</i> <sub>4</sub> at 600 MHz for <sup>1</sup> H and at 150 MHz for <sup>13</sup> C; <sup>b</sup> Recorded in methanol- <i>d</i> <sub>4</sub> at 400 MHz for <sup>1</sup> H and at |         |       |         |       |  |       |
| 3 | 100 MHz for <sup>13</sup> C; <sup>c</sup> Overlapped.                                                                                                                                                                    |         |       |         |       |  |       |

**Table S3.** Calculated total energies, relative free energies ( $\Delta G$ ), relative population (%) and theoretical (DFT B3LYP/6-31G) averaged rotary strength values for the major compound **1** conformers.

| Conf.       | Gibbs free energy (298.15K) |                          |                        |
|-------------|-----------------------------|--------------------------|------------------------|
|             | G<br>(Hartree)              | $\Delta G$<br>(kcal/mol) | Boltzmann Distribution |
| Compound1_1 | -1415.028394                | 0.000000                 | 33.127083              |
| Compound1_2 | -1415.028393                | 0.000667                 | 33.089808              |
| Compound1_3 | -1415.027419                | 0.399756                 | 16.871738              |
| Compound1_4 | -1415.027423                | 0.398366                 | 16.911371              |

**Table S4.** Calculated total energies, relative free energies ( $\Delta G$ ), relative population (%) and theoretical (DFT B3LYP/6-31G) averaged rotary strength values for the major compound **3** conformers.

| Conf.       | Gibbs free energy (298.15K) |                          |                        |
|-------------|-----------------------------|--------------------------|------------------------|
|             | G<br>(Hartree)              | $\Delta G$<br>(kcal/mol) | Boltzmann Distribution |
| Compound3_1 | -1415.02919                 | 0.000000                 | 35.772830              |
| Compound3_2 | -1415.029174                | 0.006564                 | 35.378728              |
| Compound3_3 | -1415.027829                | 0.558020                 | 13.948307              |
| Compound3_4 | -1415.027811                | 0.565288                 | 13.778268              |
| Compound3_5 | -1415.024187                | 2.051297                 | 1.121868               |

Table S5. Optimized coordinates of the conformers of compound 1.

| cartesian coordinates |              |             |             | cartesian coordinates |              |             |             |
|-----------------------|--------------|-------------|-------------|-----------------------|--------------|-------------|-------------|
| atom                  | X            | Y           | Z           | atom                  | X            | Y           | Z           |
| c                     | -2.05818793  | 2.1200817   | -0.94598065 | c                     | -2.05336471  | 2.13704984  | -0.89644187 |
| c                     | -3.00677765  | 4.54818624  | -1.57915068 | c                     | -2.99886398  | 4.5826857   | -1.46371676 |
| c                     | -5.59378241  | 4.86666572  | -1.52748914 | c                     | -5.58470738  | 4.90636908  | -1.38942276 |
| c                     | -7.26823283  | 2.86467249  | -0.91042309 | c                     | -7.26111495  | 2.89401223  | -0.81276117 |
| c                     | -6.33179299  | 0.39529831  | -0.28860594 | c                     | -6.32786045  | 0.4075329   | -0.25834706 |
| c                     | -3.64525749  | 0.12060984  | -0.27324748 | c                     | -3.6422139   | 0.1255475   | -0.26533368 |
| c                     | -9.92519797  | 3.31950905  | -0.87927663 | c                     | -9.91648253  | 3.35513497  | -0.75359873 |
| c                     | -11.63373863 | 1.47578057  | -0.26626639 | c                     | -11.62641528 | 1.50141184  | -0.17568513 |
| c                     | -10.7683488  | -0.99606203 | 0.33261788  | c                     | -10.76420843 | -0.98686269 | 0.35585984  |
| c                     | -8.14485143  | -1.58929508 | 0.29892899  | c                     | -8.14272906  | -1.58622014 | 0.29042033  |
| c                     | -7.49095452  | -4.2273974  | 0.76610494  | c                     | -7.49340087  | -4.2370107  | 0.68591303  |
| h                     | -5.49429567  | -4.78588346 | 0.58947936  | h                     | -5.49982371  | -4.79651327 | 0.48058537  |
| o                     | -9.06670395  | -5.87591361 | 1.30937155  | o                     | -9.07023183  | -5.89431658 | 1.19848301  |
| o                     | -12.51786126 | -2.70262249 | 0.88206765  | o                     | -12.51504366 | -2.70198336 | 0.87356652  |
| o                     | -2.60000864  | -2.14267633 | 0.4246449   | o                     | -2.59858475  | -2.15679881 | 0.36989529  |
| c                     | 0.00643722   | -2.12440253 | 1.13135838  | c                     | 0.00857185   | -2.15839607 | 1.07360709  |
| c                     | 1.49686723   | -0.66008446 | -0.89522777 | c                     | 1.49914114   | -0.64959611 | -0.92013961 |
| o                     | 0.50596867   | 1.85012165  | -1.01347893 | o                     | 0.50981459   | 1.8633172   | -0.98344953 |
| c                     | 4.30461186   | -0.50376985 | -0.408611   | c                     | 4.3068976    | -0.50443772 | -0.42909219 |
| c                     | 0.80581417   | -4.86063634 | 1.47276019  | c                     | 0.80486826   | -4.9029659  | 1.34943202  |
| c                     | 5.96613486   | -2.09819941 | -1.6919001  | c                     | 5.96879309   | -2.07493116 | -1.74125482 |
| c                     | 8.57658827   | -2.07751766 | -1.19765981 | c                     | 8.57889098   | -2.06458968 | -1.24476626 |
| c                     | 9.52611647   | -0.40595621 | 0.63197549  | c                     | 9.52781048   | -0.42825683 | 0.61678416  |
| c                     | 7.84245285   | 1.25219711  | 1.87983259  | c                     | 7.8439242    | 1.20639184  | 1.89485943  |
| c                     | 5.25532612   | 1.20801922  | 1.39003117  | c                     | 5.25713273   | 1.17231511  | 1.40252567  |
| o                     | 12.02357399  | -0.34750926 | 1.23275243  | o                     | 12.02484978  | -0.38213596 | 1.22005995  |
| o                     | 9.0307782    | 2.80233654  | 3.57527287  | o                     | 9.03148472   | 2.72365903  | 3.62029978  |
| o                     | 10.02298136  | -3.76951677 | -2.48195551 | o                     | 10.02609943  | -3.73247333 | -2.55934109 |
| c                     | 12.37693625  | -3.00023742 | -3.52018562 | c                     | 12.37839228  | -2.94223353 | -3.58544261 |
| c                     | 7.59341561   | 4.55651697  | 4.97896703  | c                     | 7.59278433   | 4.44739291  | 5.05985114  |
| c                     | -1.19373718  | 6.63236441  | -2.26840873 | c                     | -1.18419114  | 6.67876476  | -2.11149192 |
| h                     | -6.40155674  | 6.71453984  | -1.98789249 | h                     | -6.39009358  | 6.76728984  | -1.79872637 |
| h                     | -10.59069064 | 5.22019318  | -1.35682269 | h                     | -10.5793877  | 5.26895107  | -1.1794646  |
| h                     | -13.66955301 | 1.8190359   | -0.23005665 | h                     | -13.66093651 | 1.84919415  | -0.11784249 |
| h                     | -11.5968483  | -4.35017296 | 1.21905029  | h                     | -11.59666647 | -4.35989005 | 1.1634354   |
| h                     | 0.19669378   | -1.08426637 | 2.93976092  | h                     | 0.20243229   | -1.16109672 | 2.90568071  |
| h                     | 1.15272516   | -1.60675438 | -2.72905823 | h                     | 1.15513772   | -1.55559221 | -2.77454188 |
| h                     | 2.75797221   | -4.97694806 | 2.18870671  | h                     | 2.75772523   | -5.03871495 | 2.05997687  |
| h                     | -0.46180849  | -5.79566551 | 2.83907398  | h                     | -0.46241073  | -5.8681842  | 2.69485468  |
| h                     | 0.69546784   | -5.89787676 | -0.3350574  | h                     | 0.69083712   | -5.89743523 | -0.48213644 |
| h                     | 5.29284481   | -3.41714237 | -3.13228843 | h                     | 5.29608677   | -3.36619344 | -3.20682    |
| h                     | 3.96970889   | 2.50455149  | 2.34445899  | h                     | 3.97130871   | 2.45081236  | 2.3806917   |
| h                     | 12.23753376  | 0.96780458  | 2.51074475  | h                     | 12.23835874  | 0.90778524  | 2.52371738  |
| h                     | 12.93464453  | -4.50422808 | -4.84909574 | h                     | 12.93893363  | -4.42386843 | -4.93805146 |
| h                     | 12.18269451  | -1.20050304 | -4.57127868 | h                     | 12.18044303  | -1.12639797 | -4.6078658  |
| h                     | 13.84222372  | -2.77616577 | -2.05679991 | h                     | 13.84344854  | -2.73856157 | -2.11882786 |
| h                     | 6.62252912   | 5.92318801  | 3.72714436  | h                     | 6.62098635   | 5.83900628  | 3.83657178  |
| h                     | 6.17124258   | 3.59505176  | 6.17515093  | h                     | 6.17132529   | 3.46026039  | 6.23578973  |
| h                     | 8.93459272   | 5.57824468  | 6.19874776  | h                     | 8.93315325   | 5.44480417  | 6.30048897  |
| h                     | -2.22186892  | 8.38049288  | -2.74973639 | h                     | -2.21010375  | 8.44263329  | -2.536691   |
| h                     | 0.11923048   | 7.05374148  | -0.69835242 | h                     | 0.14351766   | 7.05300608  | -0.54191542 |
| h                     | -0.00316852  | 6.09402958  | -3.89792446 | h                     | -0.00933971  | 6.18082298  | -3.76524767 |

(Table S5 continued)

| cartesian coordinates |              |             |             | cartesian coordinates |              |             |             |
|-----------------------|--------------|-------------|-------------|-----------------------|--------------|-------------|-------------|
| atom                  | X            | Y           | Z           | atom                  | X            | Y           | Z           |
| c                     | 2.06256566   | 2.26243745  | 0.73752287  | c                     | 2.06600571   | 2.29988815  | 0.61510227  |
| c                     | 2.99539197   | 4.74975449  | 1.11376631  | c                     | 2.99900408   | 4.8009335   | 0.88257061  |
| c                     | 5.57777426   | 5.08402746  | 0.98625775  | c                     | 5.58170345   | 5.12832968  | 0.74517822  |
| c                     | 7.26357568   | 3.0468661   | 0.53737651  | c                     | 7.26725488   | 3.07297777  | 0.38765403  |
| c                     | 6.34284894   | 0.52095607  | 0.17385163  | c                     | 6.34613064   | 0.53415542  | 0.13079473  |
| c                     | 3.66051203   | 0.22279493  | 0.23186578  | c                     | 3.66355971   | 0.23953221  | 0.20002499  |
| c                     | 9.91421632   | 3.52018547  | 0.41078544  | c                     | 9.91842437   | 3.53942791  | 0.24740963  |
| c                     | 11.63163922  | 1.64117946  | -0.05373226 | c                     | 11.63608911  | 1.64189823  | -0.13318074 |
| c                     | 10.78222575  | -0.88474527 | -0.39179946 | c                     | 10.78616208  | -0.89551628 | -0.36790471 |
| c                     | 8.16613547   | -1.49524619 | -0.250541   | c                     | 8.16934359   | -1.49867405 | -0.20669282 |
| c                     | 7.53153257   | -4.17134715 | -0.44185498 | c                     | 7.53388243   | -4.18000451 | -0.29351124 |
| h                     | 5.54402196   | -4.72581412 | -0.17240555 | h                     | 5.54512402   | -4.72275143 | -0.01015603 |
| o                     | 9.11343215   | -5.85315387 | -0.84833335 | o                     | 9.11634152   | -5.87732835 | -0.62739563 |
| o                     | 12.53935383  | -2.62239151 | -0.803778   | o                     | 12.54309361  | -2.64919238 | -0.70521409 |
| o                     | 2.6236603    | -2.1049034  | -0.23310475 | o                     | 2.62690386   | -2.10631722 | -0.16186385 |
| c                     | 0.0207912    | -2.15152013 | -0.94712442 | c                     | 0.0212811    | -2.18752552 | -0.86345162 |
| c                     | -1.47792409  | -0.53311932 | 0.95101329  | c                     | -1.47157957  | -0.48360522 | 0.96272103  |
| o                     | -0.49665825  | 1.98052335  | 0.87593374  | o                     | -0.49311675  | 2.02421892  | 0.765843    |
| c                     | -4.28567096  | -0.4271024  | 0.44542708  | c                     | -4.28165532  | -0.40315439 | 0.46602861  |
| c                     | -0.77357189  | -4.90801467 | -1.06393957 | c                     | -0.77111323  | -4.94683573 | -0.8482209  |
| c                     | -5.23473828  | 1.04279482  | -1.52945469 | c                     | -5.24093982  | 0.96854199  | -1.57345913 |
| c                     | -7.82867282  | 1.10017075  | -2.08959721 | c                     | -7.83817984  | 1.00171525  | -2.1208005  |
| c                     | -9.49852385  | -0.37389754 | -0.64189803 | c                     | -9.50053961  | -0.39811031 | -0.59275227 |
| c                     | -8.53603111  | -1.82133203 | 1.38384586  | c                     | -8.52735107  | -1.74461917 | 1.49670411  |
| c                     | -5.95789337  | -1.86024057 | 1.93261659  | c                     | -5.94618441  | -1.75945192 | 2.0317986   |
| o                     | -12.01452263 | -0.44154505 | -1.15409633 | o                     | -12.01995156 | -0.48830493 | -1.08556618 |
| o                     | -10.3725295  | -3.13042303 | 2.65094348  | o                     | -10.35768336 | -2.98649544 | 2.83832831  |
| o                     | -8.56430651  | 2.52130423  | -4.09992364 | o                     | -8.58245762  | 2.32578701  | -4.1928956  |
| c                     | -10.71281465 | 4.1176407   | -3.88945669 | c                     | -10.74249477 | 3.91442042  | -4.05892715 |
| c                     | -9.69543957  | -4.68855334 | 4.70566808  | c                     | -9.67056311  | -4.43704388 | 4.96698441  |
| c                     | 1.1702103    | 6.87561295  | 1.61813152  | c                     | 1.17362679   | 6.94732187  | 1.28883122  |
| h                     | 6.37322231   | 6.97583939  | 1.24634625  | h                     | 6.37778836   | 7.029221    | 0.92437894  |
| h                     | 10.56727156  | 5.46452859  | 0.68756132  | h                     | 10.571778    | 5.49346727  | 0.44337429  |
| h                     | 13.66244539  | 1.99802898  | -0.16354207 | h                     | 13.66733239  | 1.99304745  | -0.25292135 |
| h                     | 11.6295238   | -4.30253573 | -0.9600164  | h                     | 11.6326279   | -4.33403441 | -0.794293   |
| h                     | -0.16994668  | -1.26328579 | -2.83409667 | h                     | -0.1768323   | -1.3882349  | -2.78891765 |
| h                     | -1.13256761  | -1.33075367 | 2.85582575  | h                     | -1.11723498  | -1.19062064 | 2.90121194  |
| h                     | -2.72237427  | -5.0838432  | -1.77752329 | h                     | -2.72230703  | -5.15750791 | -1.54574436 |
| h                     | 0.49926742   | -5.95067277 | -2.3445088  | h                     | 0.49811571   | -6.04795305 | -2.08253041 |
| h                     | -0.66498029  | -5.79457964 | 0.8235939   | h                     | -0.65529944  | -5.74386966 | 1.07865835  |
| h                     | -3.98923369  | 2.21870998  | -2.67942828 | h                     | -4.00133764  | 2.08597864  | -2.78643688 |
| h                     | -5.23403644  | -2.98183271 | 3.50546055  | h                     | -5.21385028  | -2.80190356 | 3.65433705  |
| h                     | -12.78820816 | -1.55849903 | 0.0956506   | h                     | -12.78676635 | -1.54059695 | 0.22315654  |
| h                     | -10.64227014 | 5.39292823  | -5.5349909  | h                     | -10.66901315 | 5.12484064  | -5.75260498 |
| h                     | -12.4952227  | 3.03964948  | -3.91331626 | h                     | -12.5176098  | 2.82431743  | -4.05199803 |
| h                     | -10.62929633 | 5.26171187  | -2.13865939 | h                     | -10.67891803 | 5.1263043   | -2.35357883 |
| h                     | -8.38612986  | -6.20951614 | 4.11274302  | h                     | -8.36636843  | -5.98851265 | 4.44626107  |
| h                     | -8.80807649  | -3.5818931  | 6.24419741  | h                     | -8.77277683  | -3.25341444 | 6.44075034  |
| h                     | -11.45893447 | -5.54098212 | 5.40824059  | h                     | -11.43089125 | -5.24945151 | 5.72291237  |
| h                     | 2.18532337   | 8.67561344  | 1.88897775  | h                     | 2.1886526    | 8.7571399   | 1.48308238  |
| h                     | -0.17966581  | 7.11178236  | 0.04084686  | h                     | -0.17178703  | 7.11493912  | -0.30117342 |
| h                     | 0.02037901   | 6.50038795  | 3.32136249  | h                     | 0.01897761   | 6.64749545  | 3.00359258  |

**Table S6.** Optimized coordinates of the conformers of compound 3.

| cartesian coordinates |              |             |             | cartesian coordinates |              |             |             |
|-----------------------|--------------|-------------|-------------|-----------------------|--------------|-------------|-------------|
| atom                  | X            | Y           | Z           | atom                  | X            | Y           | Z           |
| c                     | -3.91594672  | 3.85353959  | 0.4626245   | c                     | -3.91941219  | 3.86577718  | 0.31704822  |
| c                     | -6.42149224  | 4.81050623  | 0.50583752  | c                     | -6.4288919   | 4.81394413  | 0.32432147  |
| c                     | -8.35259007  | 3.10460362  | 0.11204765  | c                     | -8.3555851   | 3.0801263   | 0.04781114  |
| c                     | -7.89385025  | 0.49654765  | -0.3128533  | c                     | -7.88874577  | 0.4531906   | -0.22515754 |
| c                     | -5.36638267  | -0.48865364 | -0.39751472 | c                     | -5.35771774  | -0.5253376  | -0.27211717 |
| c                     | -3.39002527  | 1.3104344   | -0.01290623 | c                     | -3.38602271  | 1.30100938  | -0.01200845 |
| c                     | -9.98017333  | -1.17075255 | -0.67438296 | c                     | -9.97059766  | -1.24067733 | -0.47013437 |
| c                     | -9.66617849  | -3.70437038 | -1.09280166 | c                     | -9.64893982  | -3.79333165 | -0.74101721 |
| c                     | -7.19051771  | -4.74168996 | -1.18029879 | c                     | -7.1695123   | -4.82412797 | -0.78738012 |
| c                     | -5.02085968  | -3.18323183 | -0.85005504 | c                     | -5.00420527  | -3.24057801 | -0.56631816 |
| c                     | -2.57978084  | -4.45904234 | -0.99487554 | c                     | -2.55893235  | -4.51366597 | -0.6500993  |
| h                     | -0.8573601   | -3.31196933 | -0.78031105 | h                     | -0.83982567  | -3.3499498  | -0.51096786 |
| o                     | -2.34261199  | -6.7658018  | -1.35088707 | o                     | -2.31457062  | -6.83627693 | -0.87242277 |
| o                     | -7.01585294  | -7.20774273 | -1.58291385 | o                     | -6.98709318  | -7.30892646 | -1.04537368 |
| o                     | -0.92228829  | 0.52548059  | -0.10477329 | o                     | -0.91544473  | 0.52253724  | -0.08055808 |
| c                     | 0.96265784   | 2.42421093  | -0.48481768 | c                     | 0.95484018   | 2.40426338  | -0.59589327 |
| c                     | 0.44153394   | 4.60034676  | 1.3730277   | c                     | 0.44396213   | 4.68482744  | 1.13521216  |
| o                     | -2.03747185  | 5.56033382  | 0.89551638  | o                     | -2.04559133  | 5.60308273  | 0.63224091  |
| c                     | 2.25176964   | 6.81946134  | 1.17314285  | c                     | 2.23993062   | 6.89632233  | 0.78104755  |
| c                     | 3.52978259   | 1.21441001  | -0.18027864 | c                     | 3.53190941   | 1.2271235   | -0.2517958  |
| c                     | 5.48924137   | 1.81766448  | -1.83790538 | c                     | 5.46051853   | 1.72004305  | -1.9804832  |
| c                     | 7.92531745   | 0.80039731  | -1.54007149 | c                     | 7.90472315   | 0.73037746  | -1.65647343 |
| c                     | 8.38792084   | -0.86498654 | 0.47415807  | c                     | 8.40792757   | -0.7913912  | 0.45874696  |
| c                     | 6.38023704   | -1.51985444 | 2.11194562  | c                     | 6.43145964   | -1.33597798 | 2.17297824  |
| c                     | 3.9758176    | -0.48652134 | 1.81537807  | c                     | 4.01850971   | -0.33172815 | 1.84796009  |
| o                     | 10.71929459  | -1.8596069  | 0.88512515  | o                     | 10.74933333  | -1.75131227 | 0.89483442  |
| o                     | 9.73118173   | 1.57199961  | -3.19823994 | o                     | 9.67891151   | 1.38785677  | -3.39616409 |
| c                     | 11.37633506  | -0.23913477 | -4.30585097 | c                     | 11.30742815  | -0.49393631 | -4.40622255 |
| o                     | 7.08819388   | -3.18813035 | 3.95456178  | o                     | 7.17707159   | -2.87169462 | 4.11310823  |
| c                     | 5.26205574   | -4.08850622 | 5.67958793  | c                     | 5.38373309   | -3.65931912 | 5.92565714  |
| c                     | -6.86025154  | 7.58180877  | 0.98706597  | c                     | -6.87550789  | 7.60739033  | 0.64303555  |
| h                     | -10.31331916 | 3.76338403  | 0.14051331  | h                     | -10.31892786 | 3.73171341  | 0.05241693  |
| h                     | -11.88649232 | -0.36768153 | -0.60727223 | h                     | -11.87977561 | -0.44243406 | -0.43471276 |
| h                     | -11.25963056 | -4.98872483 | -1.36636082 | h                     | -11.23881802 | -5.09782518 | -0.92509474 |
| h                     | -5.14547619  | -7.63476703 | -1.58854672 | h                     | -5.11502883  | -7.72819637 | -1.03998351 |
| h                     | 0.7692222    | 3.18963839  | -2.42230107 | h                     | 0.73404703   | 3.05143275  | -2.57342155 |
| h                     | 0.48125896   | 3.80637977  | 3.31042074  | h                     | 0.51154679   | 4.00856442  | 3.11625775  |
| h                     | 1.61085885   | 8.35251328  | 2.43280052  | h                     | 1.60812704   | 8.49794031  | 1.95730395  |
| h                     | 4.17994998   | 6.25883019  | 1.72663725  | h                     | 4.17832958   | 6.37756488  | 1.33992378  |
| h                     | 2.30304783   | 7.56087459  | -0.77758165 | h                     | 2.26125659   | 7.52217989  | -1.21024357 |
| h                     | 5.19139572   | 3.09690623  | -3.43215248 | h                     | 5.13102136   | 2.88599465  | -3.65349622 |
| h                     | 2.43392132   | -1.00804136 | 3.07816078  | h                     | 2.50052413   | -0.77048012 | 3.16985273  |
| h                     | 10.57229193  | -2.98855323 | 2.33890489  | h                     | 10.6319787   | -2.77823002 | 2.42497579  |
| h                     | 12.32277043  | 0.73616516  | -5.8842769  | h                     | 12.21478536  | 0.36704561  | -6.07182223 |
| h                     | 12.80043713  | -0.93270862 | -2.95304527 | h                     | 12.76365774  | -1.08357333 | -3.03848532 |
| h                     | 10.29980327  | -1.86827333 | -5.06039658 | h                     | 10.22186648  | -2.17662509 | -5.01696938 |
| h                     | 3.70834816   | -5.08230231 | 4.69324551  | h                     | 3.81747486   | -4.72141392 | 5.03473884  |
| h                     | 6.24492072   | -5.42528829 | 6.93524645  | h                     | 6.39293683   | -4.90604021 | 7.25119006  |
| h                     | 4.4633833    | -2.53098076 | 6.82609788  | h                     | 4.59810021   | -2.03079946 | 6.9784467   |
| h                     | -8.89636559  | 8.02517181  | 0.96335334  | h                     | -8.91367187  | 8.04086433  | 0.61135525  |
| h                     | -6.07970648  | 8.16578274  | 2.83505855  | h                     | -6.08071331  | 8.30353435  | 2.44553863  |
| h                     | -5.91183147  | 8.76355424  | -0.45157464 | h                     | -5.94510876  | 8.70445107  | -0.87252558 |

(Table S6 continued)

| cartesian coordinates |              |             |             | cartesian coordinates |              |             |             |
|-----------------------|--------------|-------------|-------------|-----------------------|--------------|-------------|-------------|
| atom                  | X            | Y           | Z           | atom                  | X            | Y           | Z           |
| c                     | 4.01843493   | 3.75685583  | -0.25746359 | c                     | 3.97740116   | 3.79056326  | -0.38964932 |
| c                     | 6.54477476   | 4.65959587  | -0.25740607 | c                     | 6.49580046   | 4.71471737  | -0.41646486 |
| c                     | 8.44511353   | 2.87613971  | -0.19991566 | c                     | 8.41088926   | 2.95337797  | -0.25737503 |
| c                     | 7.93575105   | 0.24321451  | -0.15516167 | c                     | 7.92388701   | 0.32139341  | -0.08702038 |
| c                     | 5.38863904   | -0.69355558 | -0.13892712 | c                     | 5.38492716   | -0.63607364 | -0.04486961 |
| c                     | 3.44491258   | 1.18137783  | -0.16261619 | c                     | 3.42555751   | 1.21787905  | -0.17337901 |
| c                     | 9.99029141   | -1.50035893 | -0.09777391 | c                     | 9.99243608   | -1.3990202  | 0.07202464  |
| c                     | 9.62544175   | -4.06034443 | -0.02100818 | c                     | 9.64853592   | -3.95527373 | 0.27156026  |
| c                     | 7.12810245   | -5.04914645 | -0.00911047 | c                     | 7.15966069   | -4.9644112  | 0.3113289   |
| c                     | 4.98976011   | -3.41692337 | -0.08352852 | c                     | 5.00846269   | -3.35678084 | 0.13923884  |
| c                     | 2.52307398   | -4.65223964 | -0.14359782 | c                     | 2.55296449   | -4.61534712 | 0.11551988  |
| h                     | 0.82562074   | -3.45633602 | -0.27366564 | h                     | 0.84705376   | -3.44250679 | -0.09079577 |
| o                     | 2.24172643   | -6.97966501 | -0.07044646 | o                     | 2.29046408   | -6.93879622 | 0.30024023  |
| o                     | 6.9044328    | -7.54309297 | 0.05951027  | o                     | 6.95621467   | -7.45389871 | 0.49962346  |
| o                     | 0.96344473   | 0.43951004  | -0.07903725 | o                     | 0.95026268   | 0.45874898  | -0.07066125 |
| c                     | -0.84145218  | 2.29300066  | 0.70135719  | c                     | -0.87635559  | 2.33080544  | 0.60800188  |
| c                     | -0.35556542  | 4.72746038  | -0.81165521 | c                     | -0.40192302  | 4.69491952  | -1.01574239 |
| o                     | 2.17057644   | 5.54969209  | -0.33078503 | o                     | 2.11469234   | 5.56119335  | -0.56191941 |
| c                     | -2.08973707  | 6.9187458   | -0.15236067 | c                     | -2.15867269  | 6.89899473  | -0.46871956 |
| c                     | -3.45814833  | 1.20724442  | 0.35678394  | c                     | -3.4801693   | 1.20432068  | 0.297192    |
| c                     | -4.15743406  | 0.10300595  | -1.93771733 | c                     | -4.15586196  | 0.00038966  | -1.95381535 |
| c                     | -6.60048928  | -0.85869736 | -2.3230895  | c                     | -6.5855793   | -1.00512425 | -2.31074078 |
| c                     | -8.38376934  | -0.68642128 | -0.36097469 | c                     | -8.3793997   | -0.77615401 | -0.36398643 |
| c                     | -7.65723475  | 0.3911637   | 1.97030729  | c                     | -7.67611354  | 0.40261326  | 1.92512046  |
| c                     | -5.22373466  | 1.33733188  | 2.33814407  | c                     | -5.25597369  | 1.39267021  | 2.26455346  |
| o                     | -10.78982823 | -1.52774849 | -0.66652643 | o                     | -10.77420542 | -1.65759409 | -0.64472803 |
| o                     | -7.14173132  | -1.82131316 | -4.64251386 | o                     | -7.10245388  | -2.06505802 | -4.59275697 |
| c                     | -8.36374211  | -4.20716632 | -4.8288256  | c                     | -8.31501622  | -4.46084939 | -4.69453773 |
| o                     | -9.56527637  | 0.40458201  | 3.71642168  | o                     | -9.59180795  | 0.46247319  | 3.66183876  |
| c                     | -9.12168356  | 1.4238961   | 6.13975647  | c                     | -9.16922588  | 1.57862754  | 6.04594553  |
| c                     | 7.03645027   | 7.46285198  | -0.32745442 | c                     | 6.96386627   | 7.51541683  | -0.62125944 |
| h                     | 10.41979161  | 3.49253043  | -0.19783747 | h                     | 10.38004022  | 3.58713094  | -0.2711492  |
| h                     | 11.91309581  | -0.73484273 | -0.1101077  | h                     | 11.90878274  | -0.61813133 | 0.03730466  |
| h                     | 11.19336684  | -5.4029377  | 0.02807322  | h                     | 11.22739892  | -5.27979438 | 0.39901101  |
| h                     | 5.02441501   | -7.92784103 | 0.04053942  | h                     | 5.07976318   | -7.8556494  | 0.48323905  |
| h                     | -0.51795448  | 2.73221555  | 2.7227604   | h                     | -0.57181329  | 2.86824084  | 2.60849101  |
| h                     | -0.52477968  | 4.2592396   | -2.84514361 | h                     | -0.55591618  | 4.1305943   | -3.02598352 |
| h                     | -1.47842225  | 8.62327113  | -1.18603915 | h                     | -1.55845493  | 8.5583869   | -1.5794886  |
| h                     | -4.05968136  | 6.48984666  | -0.67711392 | h                     | -4.12215844  | 6.42725439  | -0.98093517 |
| h                     | -2.00985329  | 7.3384037   | 1.89161592  | h                     | -2.09227275  | 7.41514245  | 1.55344067  |
| h                     | -2.81553688  | -0.07517478 | -3.49542606 | h                     | -2.80469034  | -0.22406725 | -3.49737069 |
| h                     | -4.67808898  | 2.16114555  | 4.14880315  | h                     | -4.7283178   | 2.29539789  | 4.04253331  |
| h                     | -11.66735006 | -1.24724171 | 0.93335729  | h                     | -11.66135714 | -1.32485294 | 0.93977374  |
| h                     | -8.19921684  | -4.78117358 | -6.82407166 | h                     | -8.11847074  | -5.1192755  | -6.66066283 |
| h                     | -7.40791227  | -5.63272552 | -3.63082553 | h                     | -7.37404078  | -5.83049307 | -3.42200487 |
| h                     | -10.37399842 | -4.0984487  | -4.29281542 | h                     | -10.33341881 | -4.33614582 | -4.19396361 |
| h                     | -8.61106075  | 3.4507876   | 6.03445918  | h                     | -8.68131845  | 3.60576052  | 5.86509495  |
| h                     | -10.90041198 | 1.22299835  | 7.20076032  | h                     | -10.94961032 | 1.39777918  | 7.10775511  |
| h                     | -7.6050025   | 0.38543916  | 7.13966959  | h                     | -7.64469527  | 0.5965284   | 7.08985965  |
| h                     | 9.08281533   | 7.85735992  | -0.32314466 | h                     | 9.00658799   | 7.92832343  | -0.61469533 |
| h                     | 6.1994073    | 8.33876824  | -2.02962448 | h                     | 6.13872231   | 8.29759107  | -2.37421482 |
| h                     | 6.17652733   | 8.42795231  | 1.31440678  | h                     | 6.07698833   | 8.55343611  | 0.96062672  |

(Table S6 continued)

| cartesian coordinates |             |             |             |
|-----------------------|-------------|-------------|-------------|
| atom                  | X           | Y           | Z           |
| c                     | -1.55659328 | -4.13874279 | 0.12432016  |
| c                     | -2.39128148 | -5.3736379  | -2.10675626 |
| c                     | -4.1673072  | -4.13675102 | -3.5610242  |
| c                     | -5.15174858 | -1.73657921 | -2.88254637 |
| c                     | -4.33204422 | -0.4778084  | -0.623709   |
| c                     | -2.46387098 | -1.76310892 | 0.83552859  |
| c                     | -6.94835919 | -0.53267349 | -4.49042003 |
| c                     | -7.91307859 | 1.81292029  | -3.97333455 |
| c                     | -7.14424568 | 3.10580843  | -1.74922145 |
| c                     | -5.40836842 | 1.98360899  | -0.02696311 |
| c                     | -4.91645975 | 3.39045339  | 2.28940167  |
| h                     | -3.75926138 | 2.47537766  | 3.75846437  |
| o                     | -5.76398131 | 5.53676396  | 2.71387602  |
| o                     | -8.14649016 | 5.36780153  | -1.35049396 |
| o                     | -1.54419094 | -0.66142309 | 2.99775131  |
| c                     | 0.92560737  | -1.48538484 | 3.78657324  |
| c                     | 0.89703563  | -4.3780121  | 3.92576221  |
| o                     | 0.22135949  | -5.39056    | 1.50923779  |
| c                     | -0.87091914 | -5.385277   | 5.97384391  |
| c                     | 2.99038294  | -0.29117248 | 2.17740314  |
| c                     | 4.63871203  | -1.67184904 | 0.65146898  |
| c                     | 6.53003361  | -0.47910205 | -0.78723392 |
| c                     | 6.7628832   | 2.1594416   | -0.69040113 |
| c                     | 5.05134311  | 3.56224721  | 0.81070309  |
| c                     | 3.20102093  | 2.36377416  | 2.24388251  |
| o                     | 8.60113668  | 3.39784811  | -1.98701615 |
| o                     | 8.10414681  | -1.99958435 | -2.13966343 |
| c                     | 8.6751442   | -1.37774914 | -4.68766824 |
| o                     | 5.4763444   | 6.10987453  | 0.71031489  |
| c                     | 3.89748664  | 7.75745103  | 2.09518636  |
| c                     | -1.32240764 | -7.92292607 | -2.78746453 |
| h                     | -4.84851472 | -5.01894275 | -5.30376739 |
| h                     | -7.54474646 | -1.53390603 | -6.20116913 |
| h                     | -9.27497029 | 2.74892654  | -5.21137971 |
| h                     | -7.43127699 | 6.00424039  | 0.30851797  |
| h                     | 1.08414972  | -0.73954028 | 5.7245905   |
| h                     | 2.82581851  | -5.07542025 | 4.27807224  |
| h                     | -0.93124384 | -7.46753604 | 5.89214607  |
| h                     | -0.18928154 | -4.8197519  | 7.86434584  |
| h                     | -2.80646807 | -4.6506844  | 5.72798027  |
| h                     | 4.51177436  | -3.72210754 | 0.48781207  |
| h                     | 1.90028677  | 3.46124009  | 3.40919444  |
| h                     | 8.37135571  | 5.19951265  | -1.65406335 |
| h                     | 9.57356591  | -3.07040171 | -5.504533   |
| h                     | 6.93185555  | -0.94717235 | -5.7644447  |
| h                     | 9.97676076  | 0.24295145  | -4.8257019  |
| h                     | 4.03519385  | 7.39539296  | 4.15142852  |
| h                     | 4.56367403  | 9.68768757  | 1.69562536  |
| h                     | 1.89984237  | 7.58063086  | 1.50040036  |
| h                     | -2.18284787 | -8.64197173 | -4.5440062  |
| h                     | 0.74769907  | -7.83234796 | -3.05900455 |
| h                     | -1.65720448 | -9.31848712 | -1.26924065 |
